# Supplementary material for: Endometriotic lesions exhibit distinct metabolic signature compared to paired eutopic endometrium at the single-cell level
Source: PubMed Central journal article supplement (PMC11339455; doi:10.1038/s42003-024-06713-5), 2024-08-21
Supplement: 42003_2024_6713_MOESM2_ESM.pdf [file 42003_2024_6713_MOESM2_ESM.pdf]

**Supplementary Information** for manuscript: “Endometriotic lesions exhibit distinct metabolic signature compared to paired eutopic endometrium at the single-cell level”

**Authors:** Meruert Sarsenova<sup>a,b,c,d</sup>, Ankita Lawarde<sup>a,d</sup>, Amruta D. S. Pathare<sup>a,d</sup>, Merli Saare<sup>a,d</sup>, Vijayachitra Modhukur<sup>a,d</sup>, Pille Soplepmann<sup>e</sup>, Anton Terasmaa<sup>f</sup>, Tuuli Käämbre<sup>f</sup>, Kristina Gemzell-Danielsson<sup>b,c</sup>, Parameswaran Grace Luther Lalitkumar<sup>b,c</sup>, Andres Salumets<sup>a,d,g,h\*</sup>, Maire Peters<sup>a,d</sup>

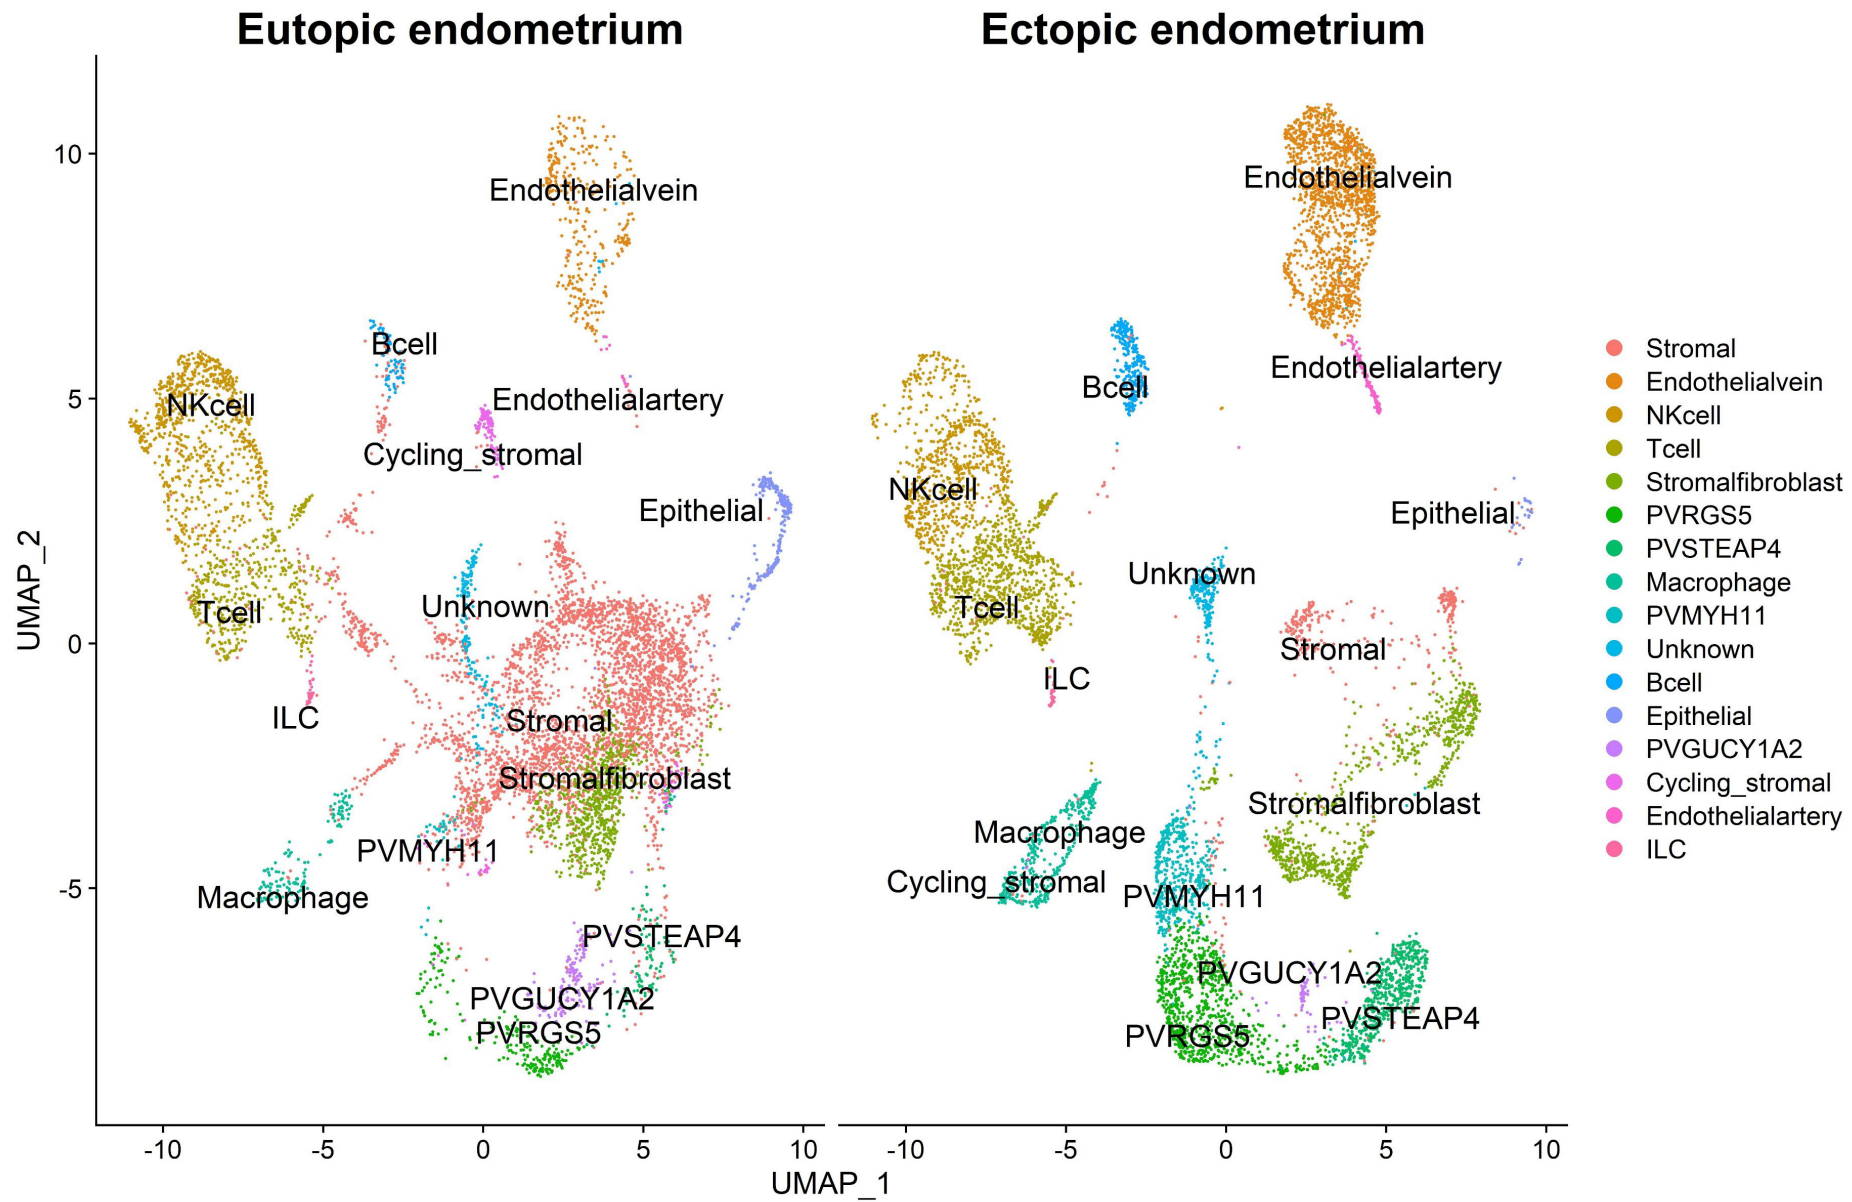

**Supplementary Figure 1.** UMAP of 16 unmerged clusters. The clusters of eutopic endometrium – on the left side, ectopic endometrium – on the right side.

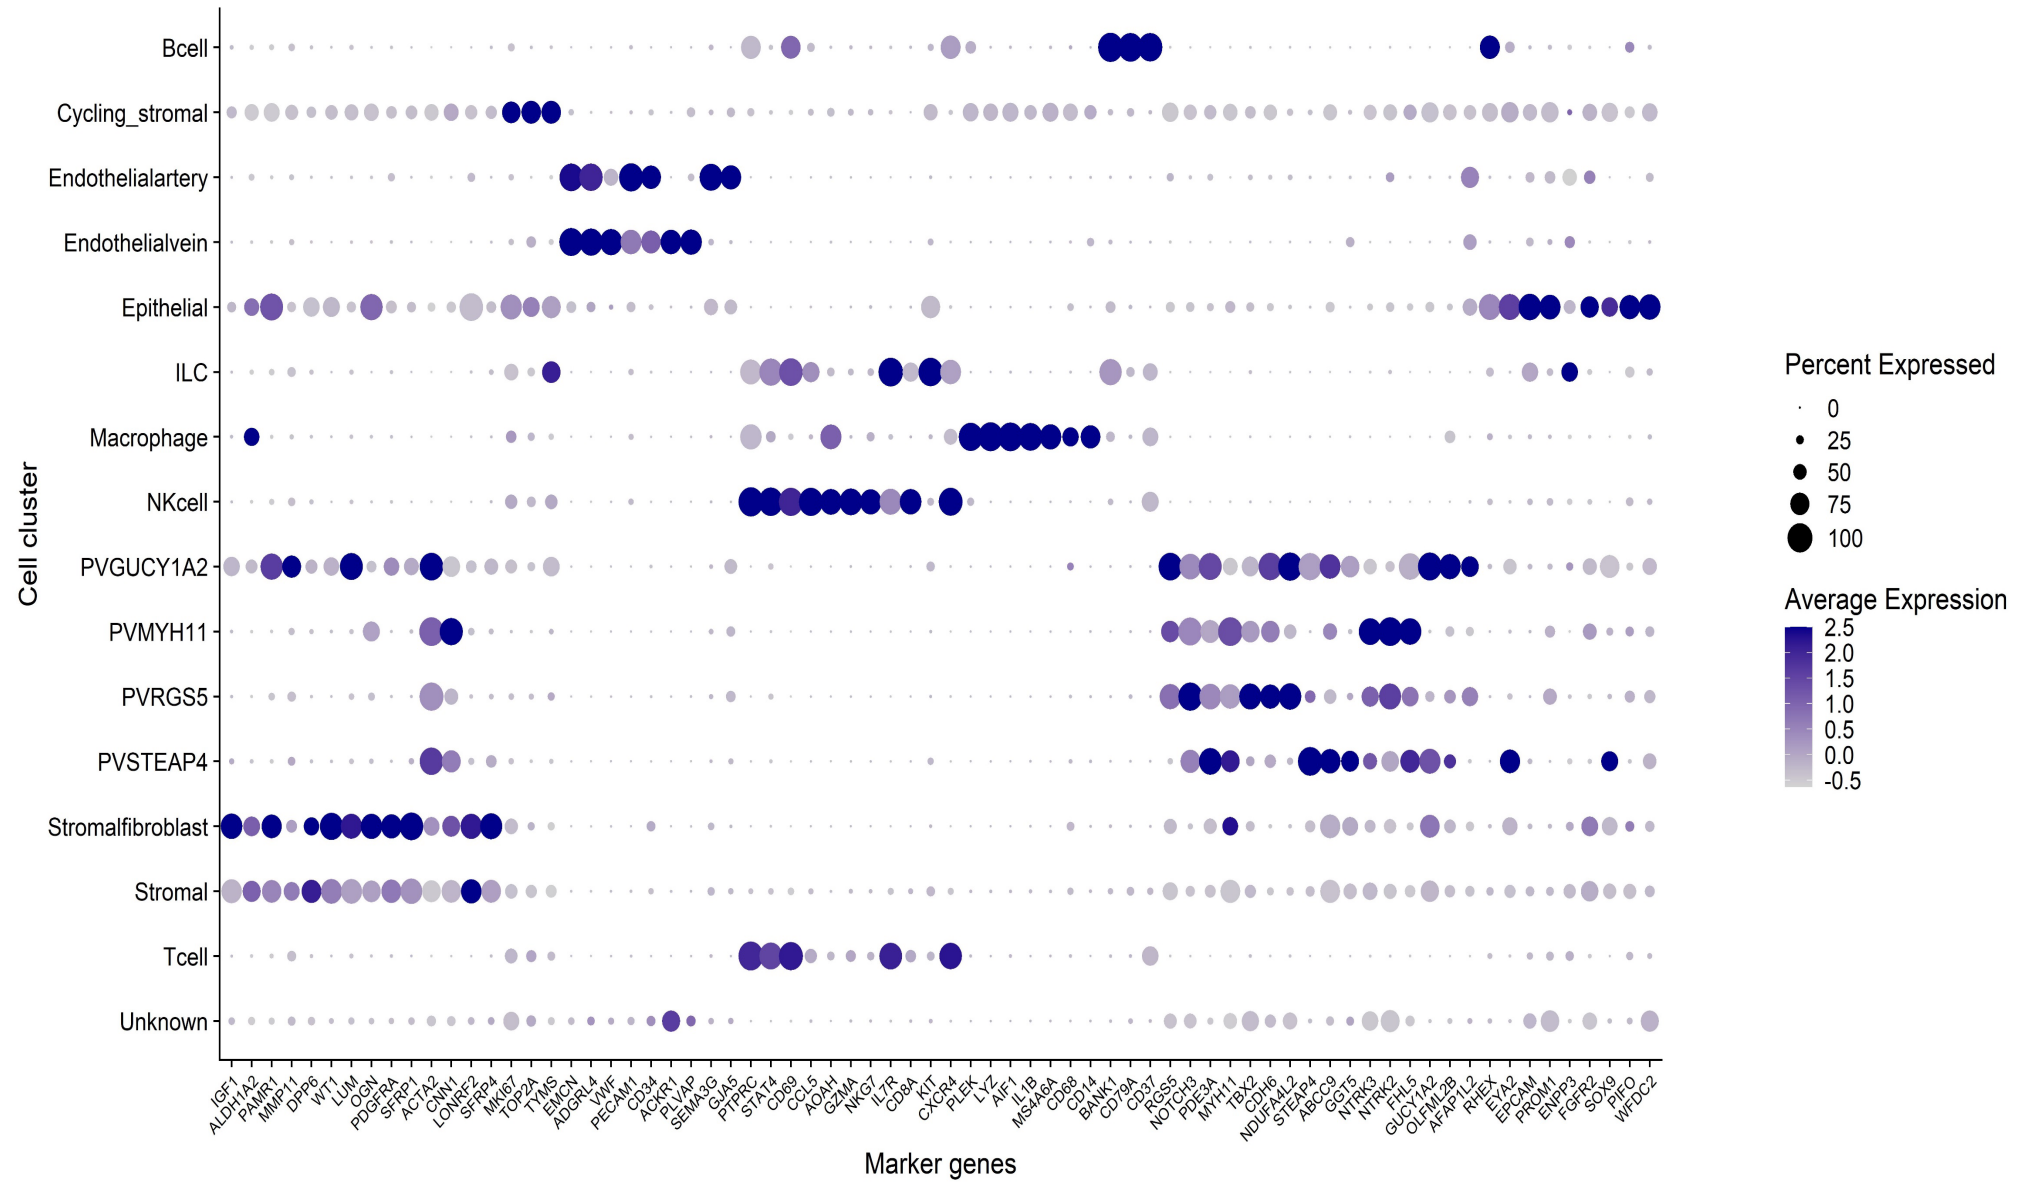

**Supplementary Figure 2.** Differentially expressed gene markers in 16 unmerged clusters. Each dot shows the average gene expression and percent expressed. Each cluster exhibited the expression of cell-type representative marker genes.

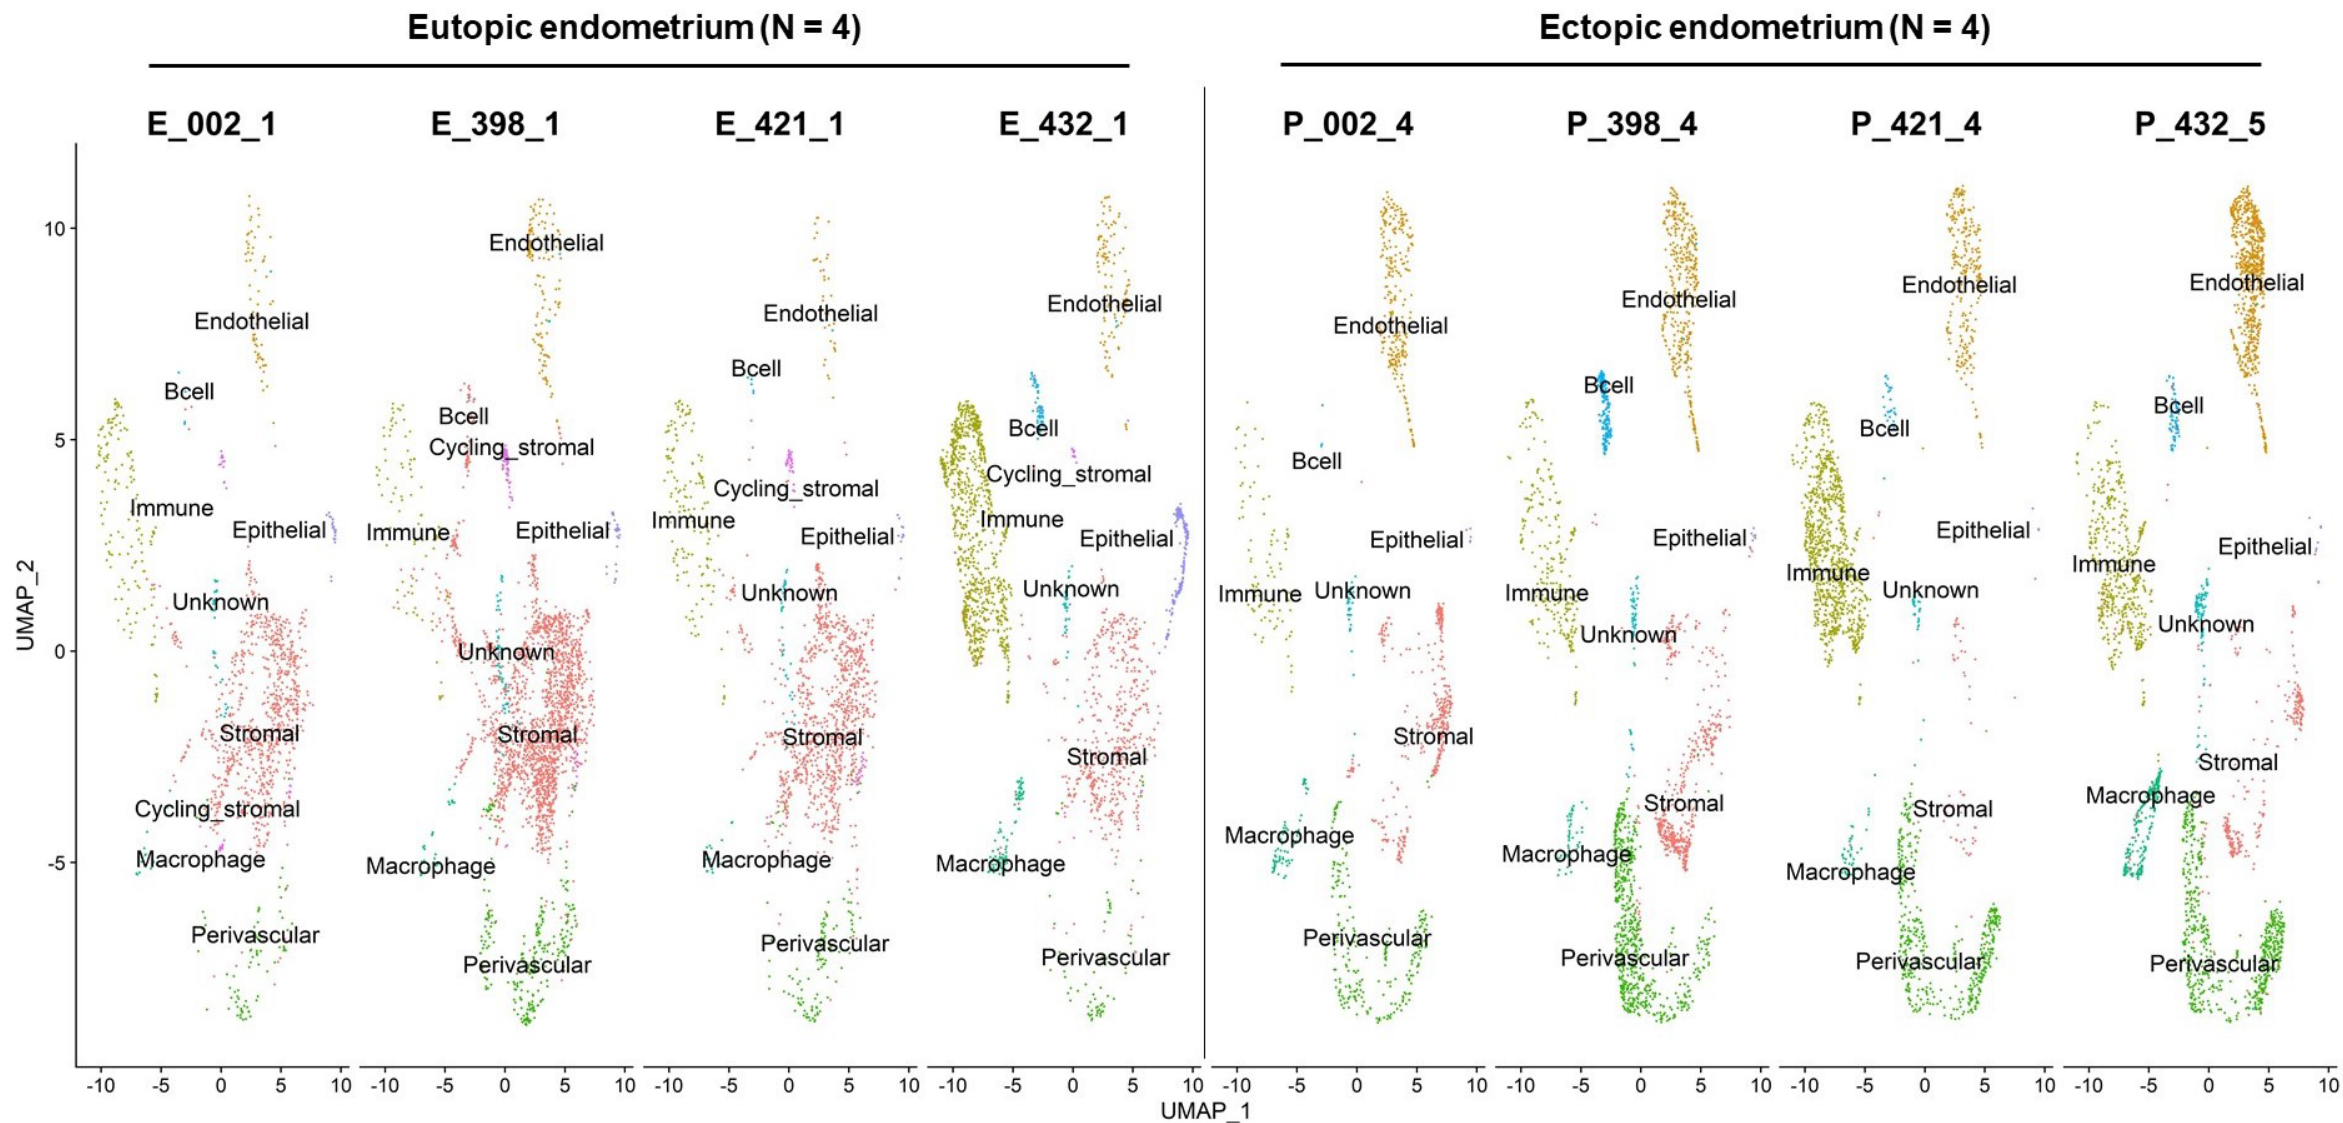

**Supplementary Figure 3.** UMAP of 9 major clusters in 8 samples (4 EuE and 4 EcE) showing inter-patient similarity within the two groups (EuE or EcE) and inter-group variability. The clusters of eutopic endometria – on the left side, ectopic endometria – on the right side.

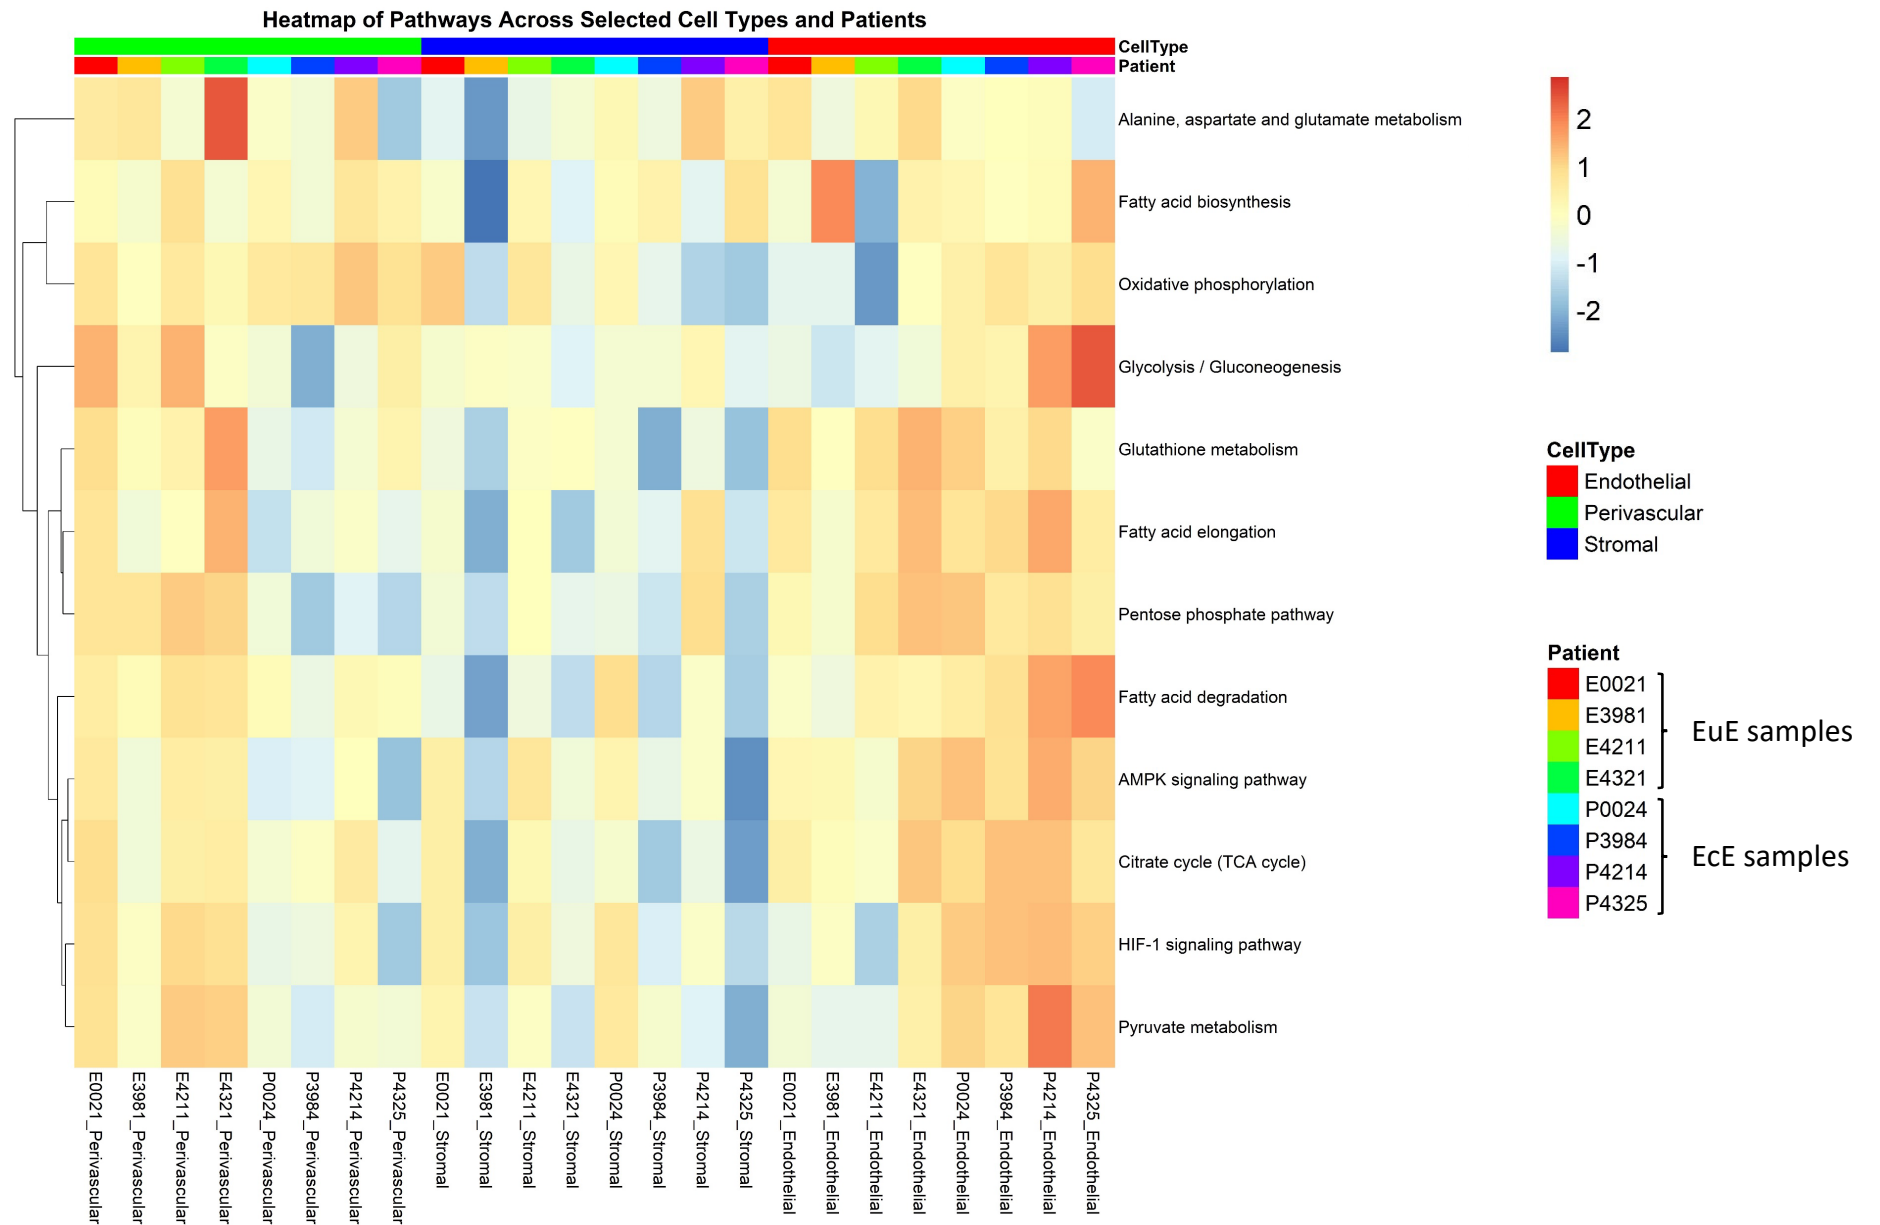

**Supplementary Figure 4.** Heatmap showing the metabolic pathway (N = 12) activity in perivascular, stromal and endothelial cell populations in each sample. EuE – eutopic endometrium; EcE – ectopic endometrium; the GSVA score ranging from blue to red corresponds to sample-wise pathway activity.

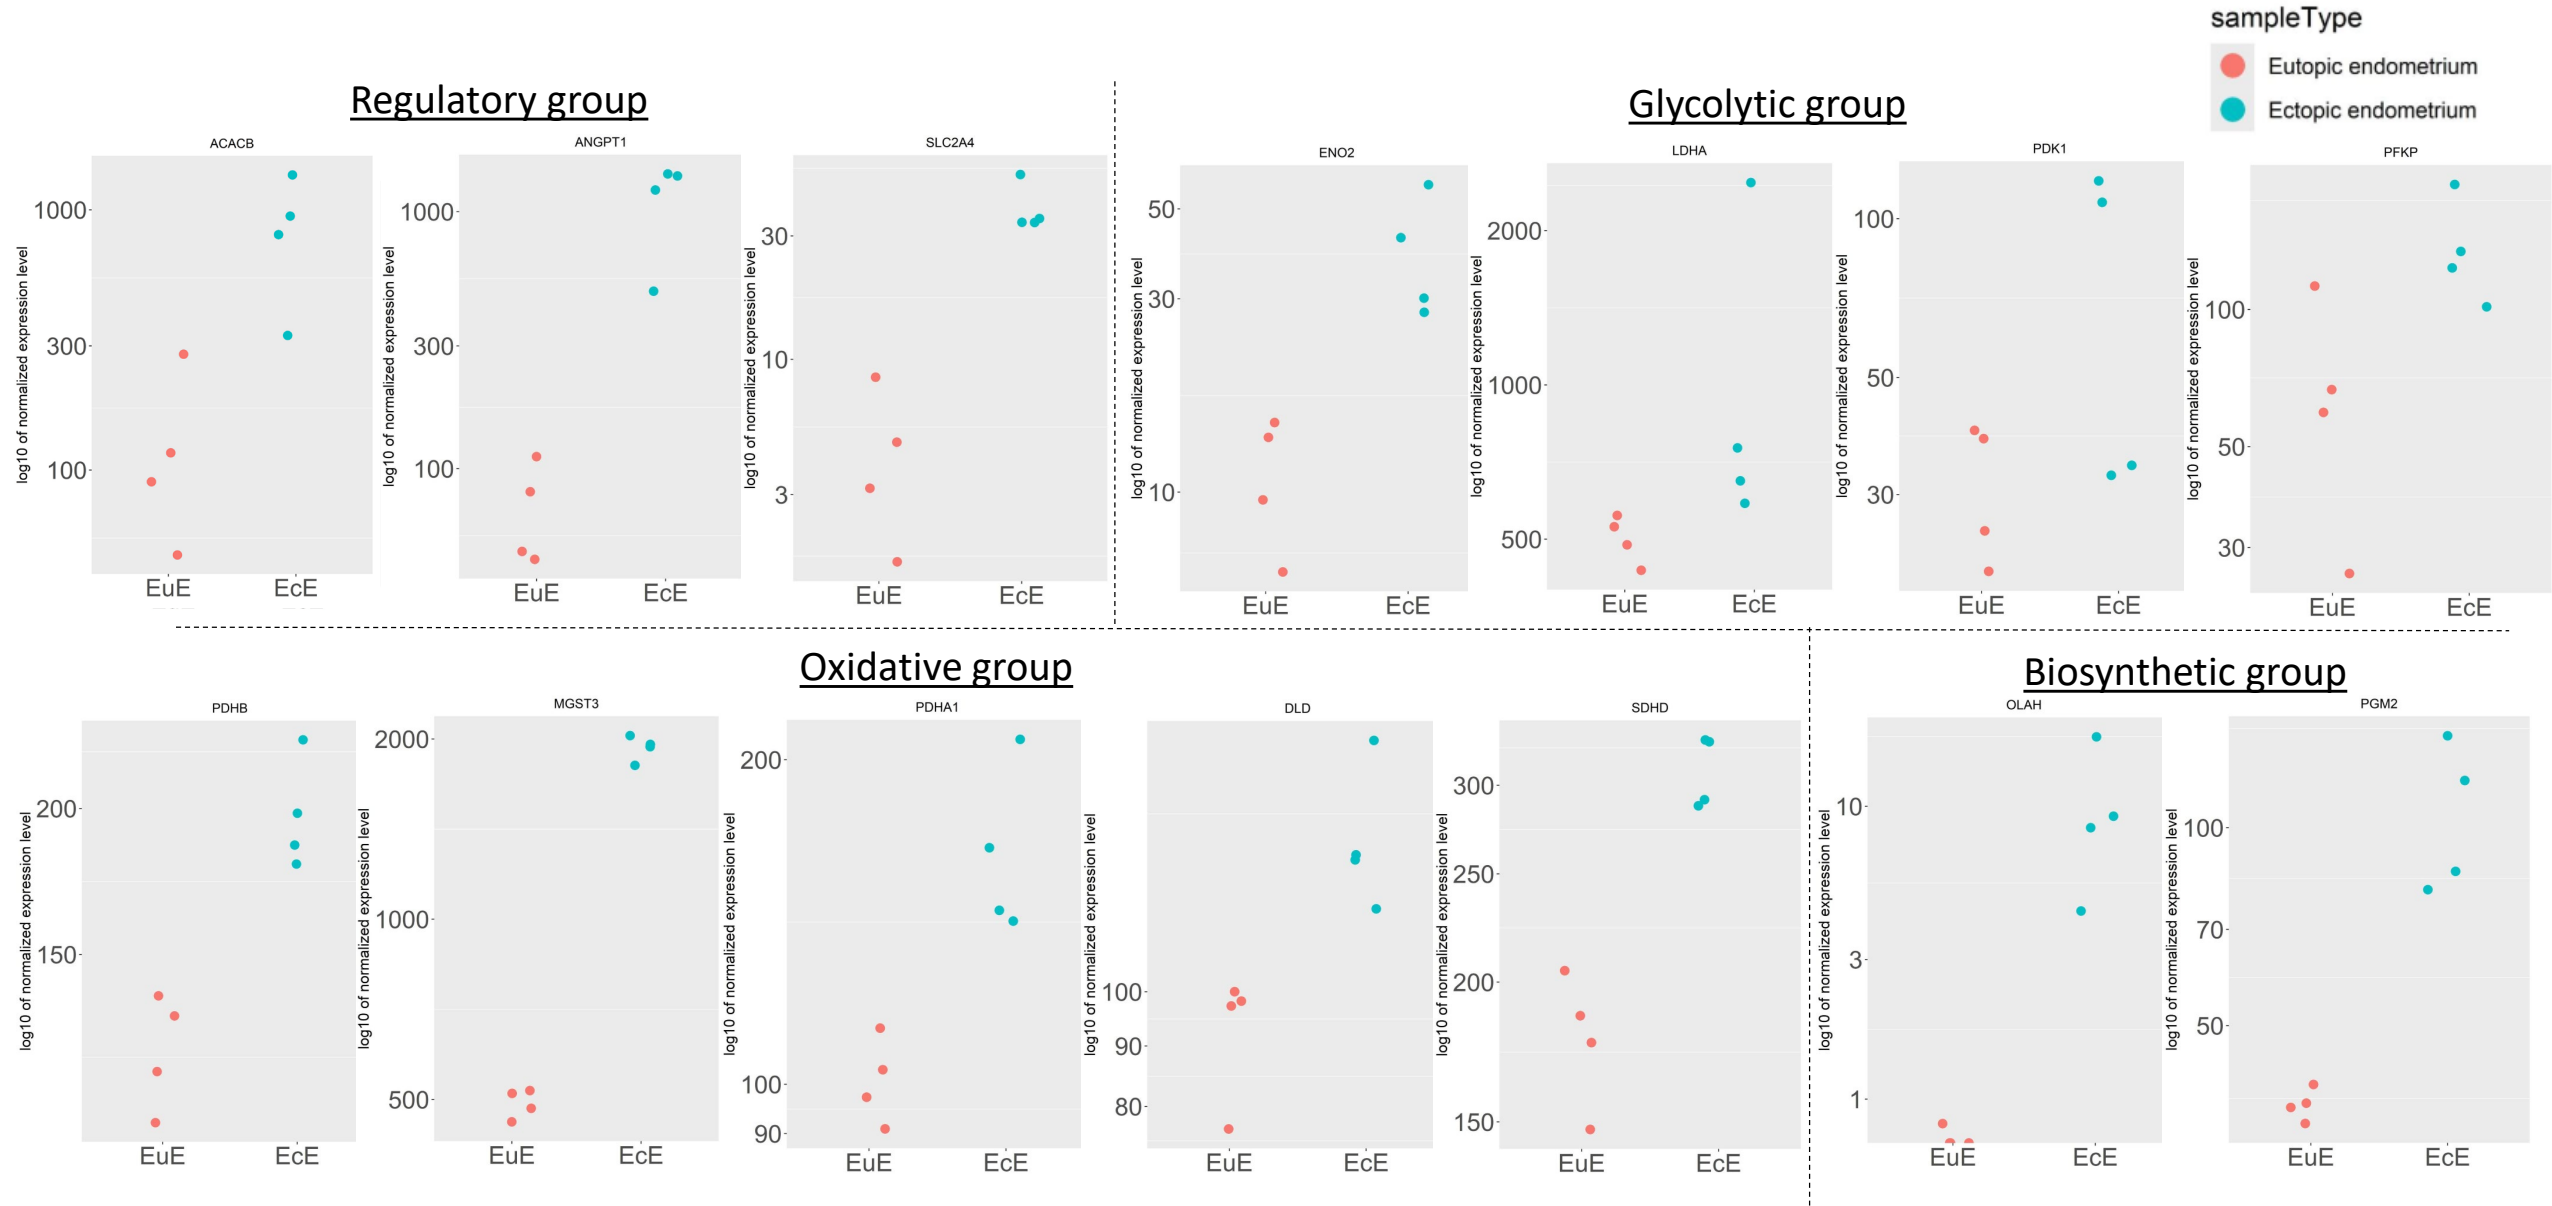

**Supplementary Figure 5.** Dot-plots of representative metabolic DEGs ( $p_{\text{adj}} < 0.05$ ,  $\log_{10}$  of normalised expression level) from four main metabolic groups (Regulatory pathways, Glycolytic metabolism, Oxidative metabolism and Biosynthetic pathways, from Table 2 in the manuscript), illustrating the level of expression in **perivascular** cells across eutopic (EuE,  $N = 4$ , red dots) and ectopic (EcE,  $N = 4$ , blue dots) endometrial samples.

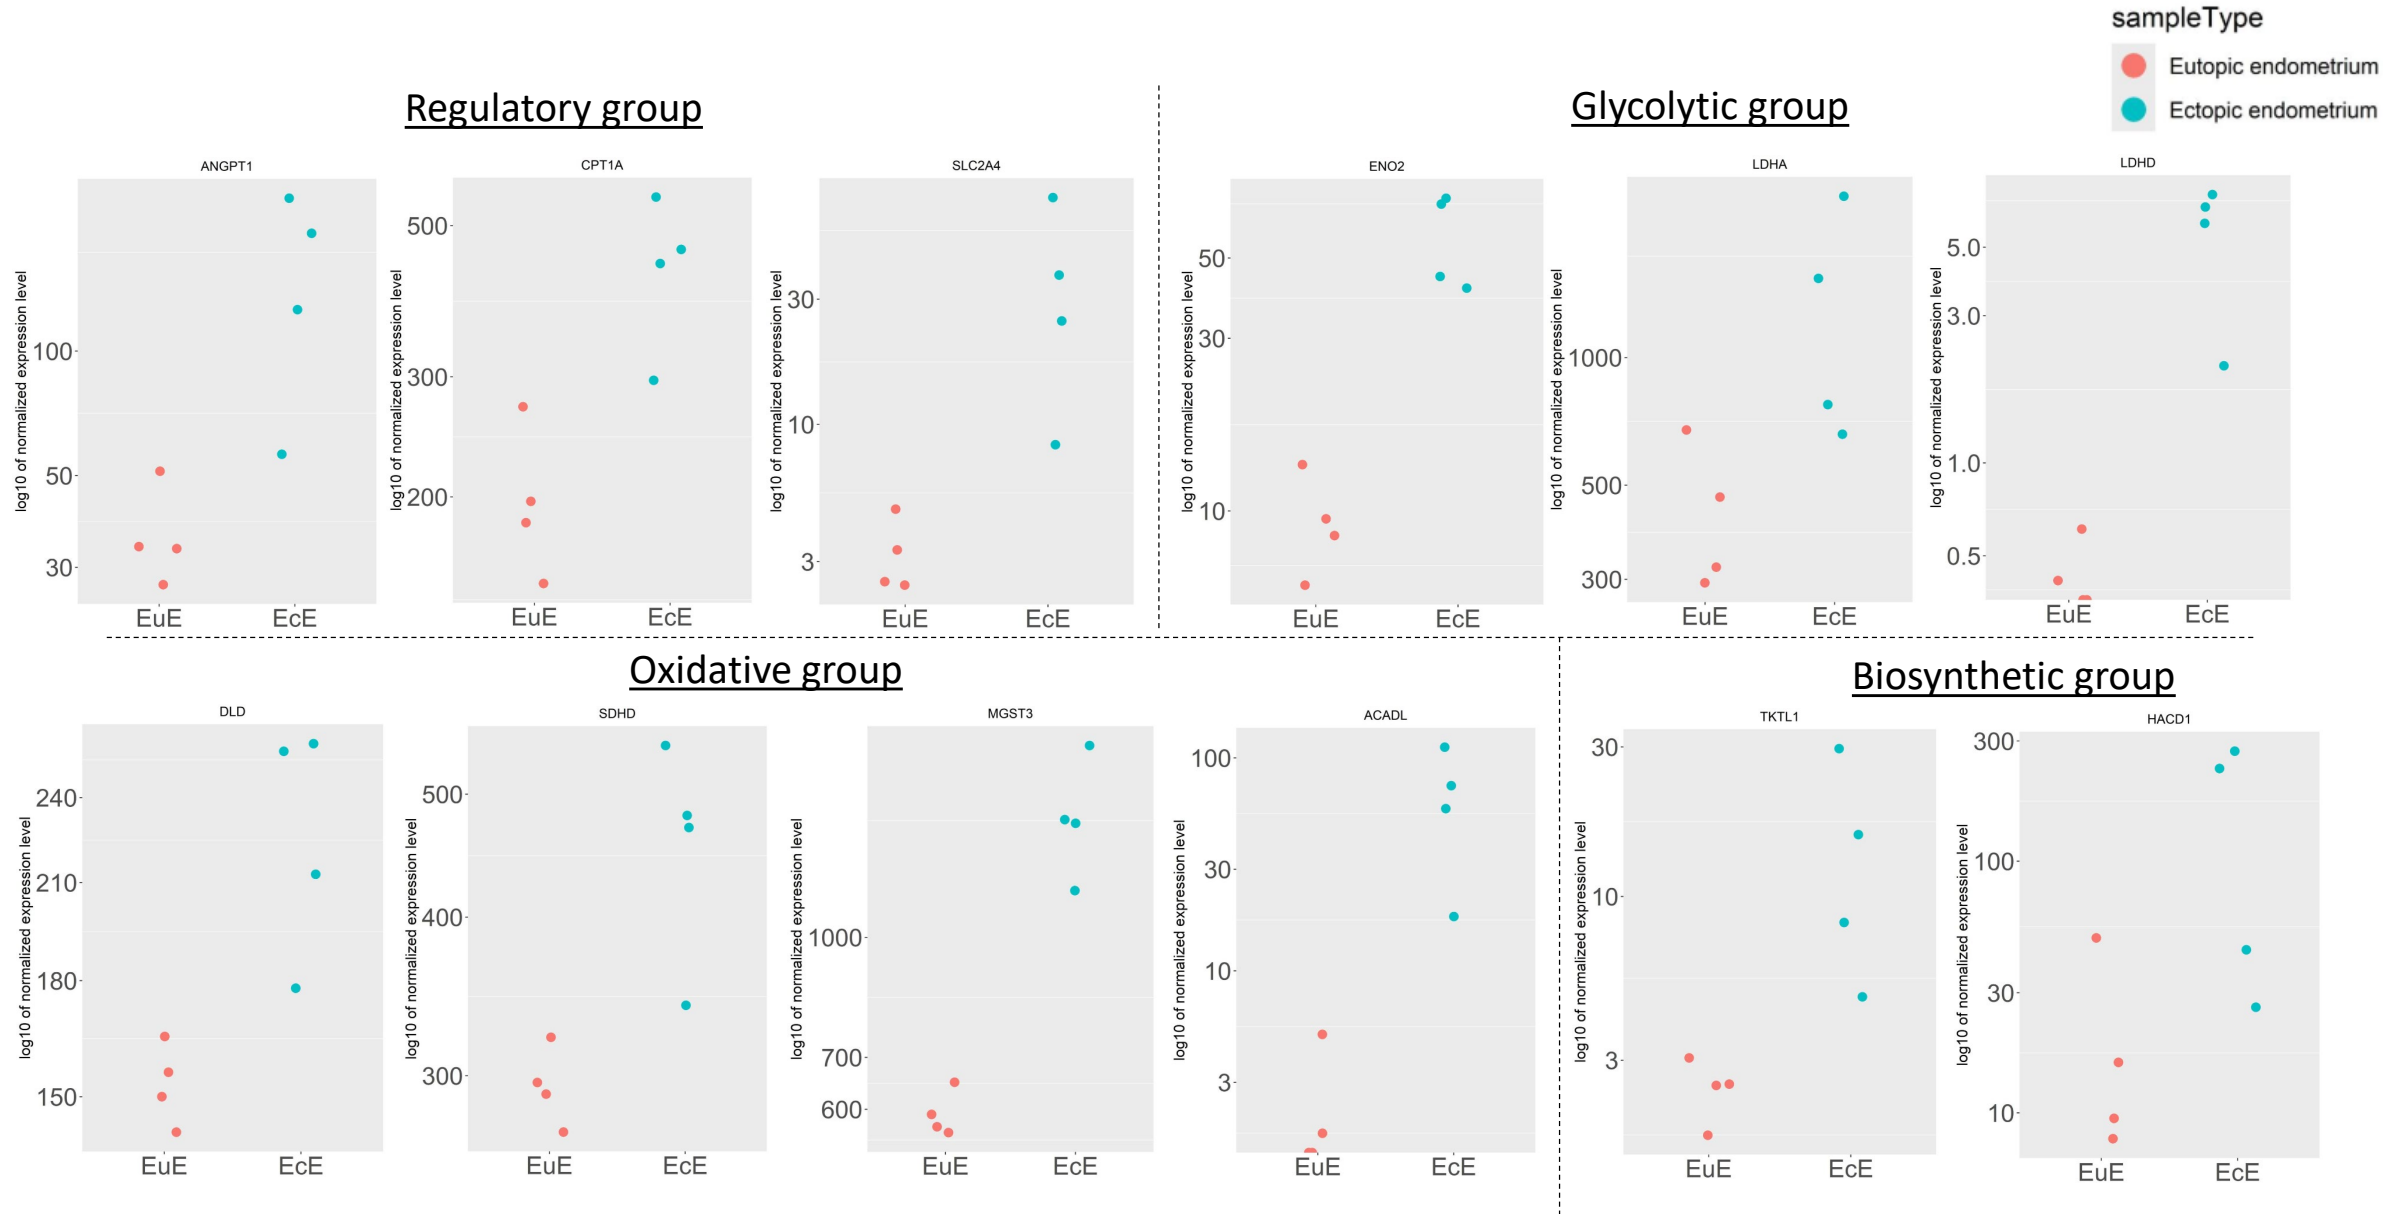

**Supplementary Figure 6.** Dot-plots of representative metabolic DEGs ( $p_{adj} < 0.05$ ,  $\log_{10}$  of normalised expression level) from four main metabolic groups (Regulatory pathways, Glycolytic metabolism, Oxidative metabolism and Biosynthetic pathways, from Table 2 in the manuscript), illustrating the level of expression in **stromal** cells across eutopic (EuE, N = 4, red dots) and ectopic (EcE, N = 4, blue dots) endometrial samples.

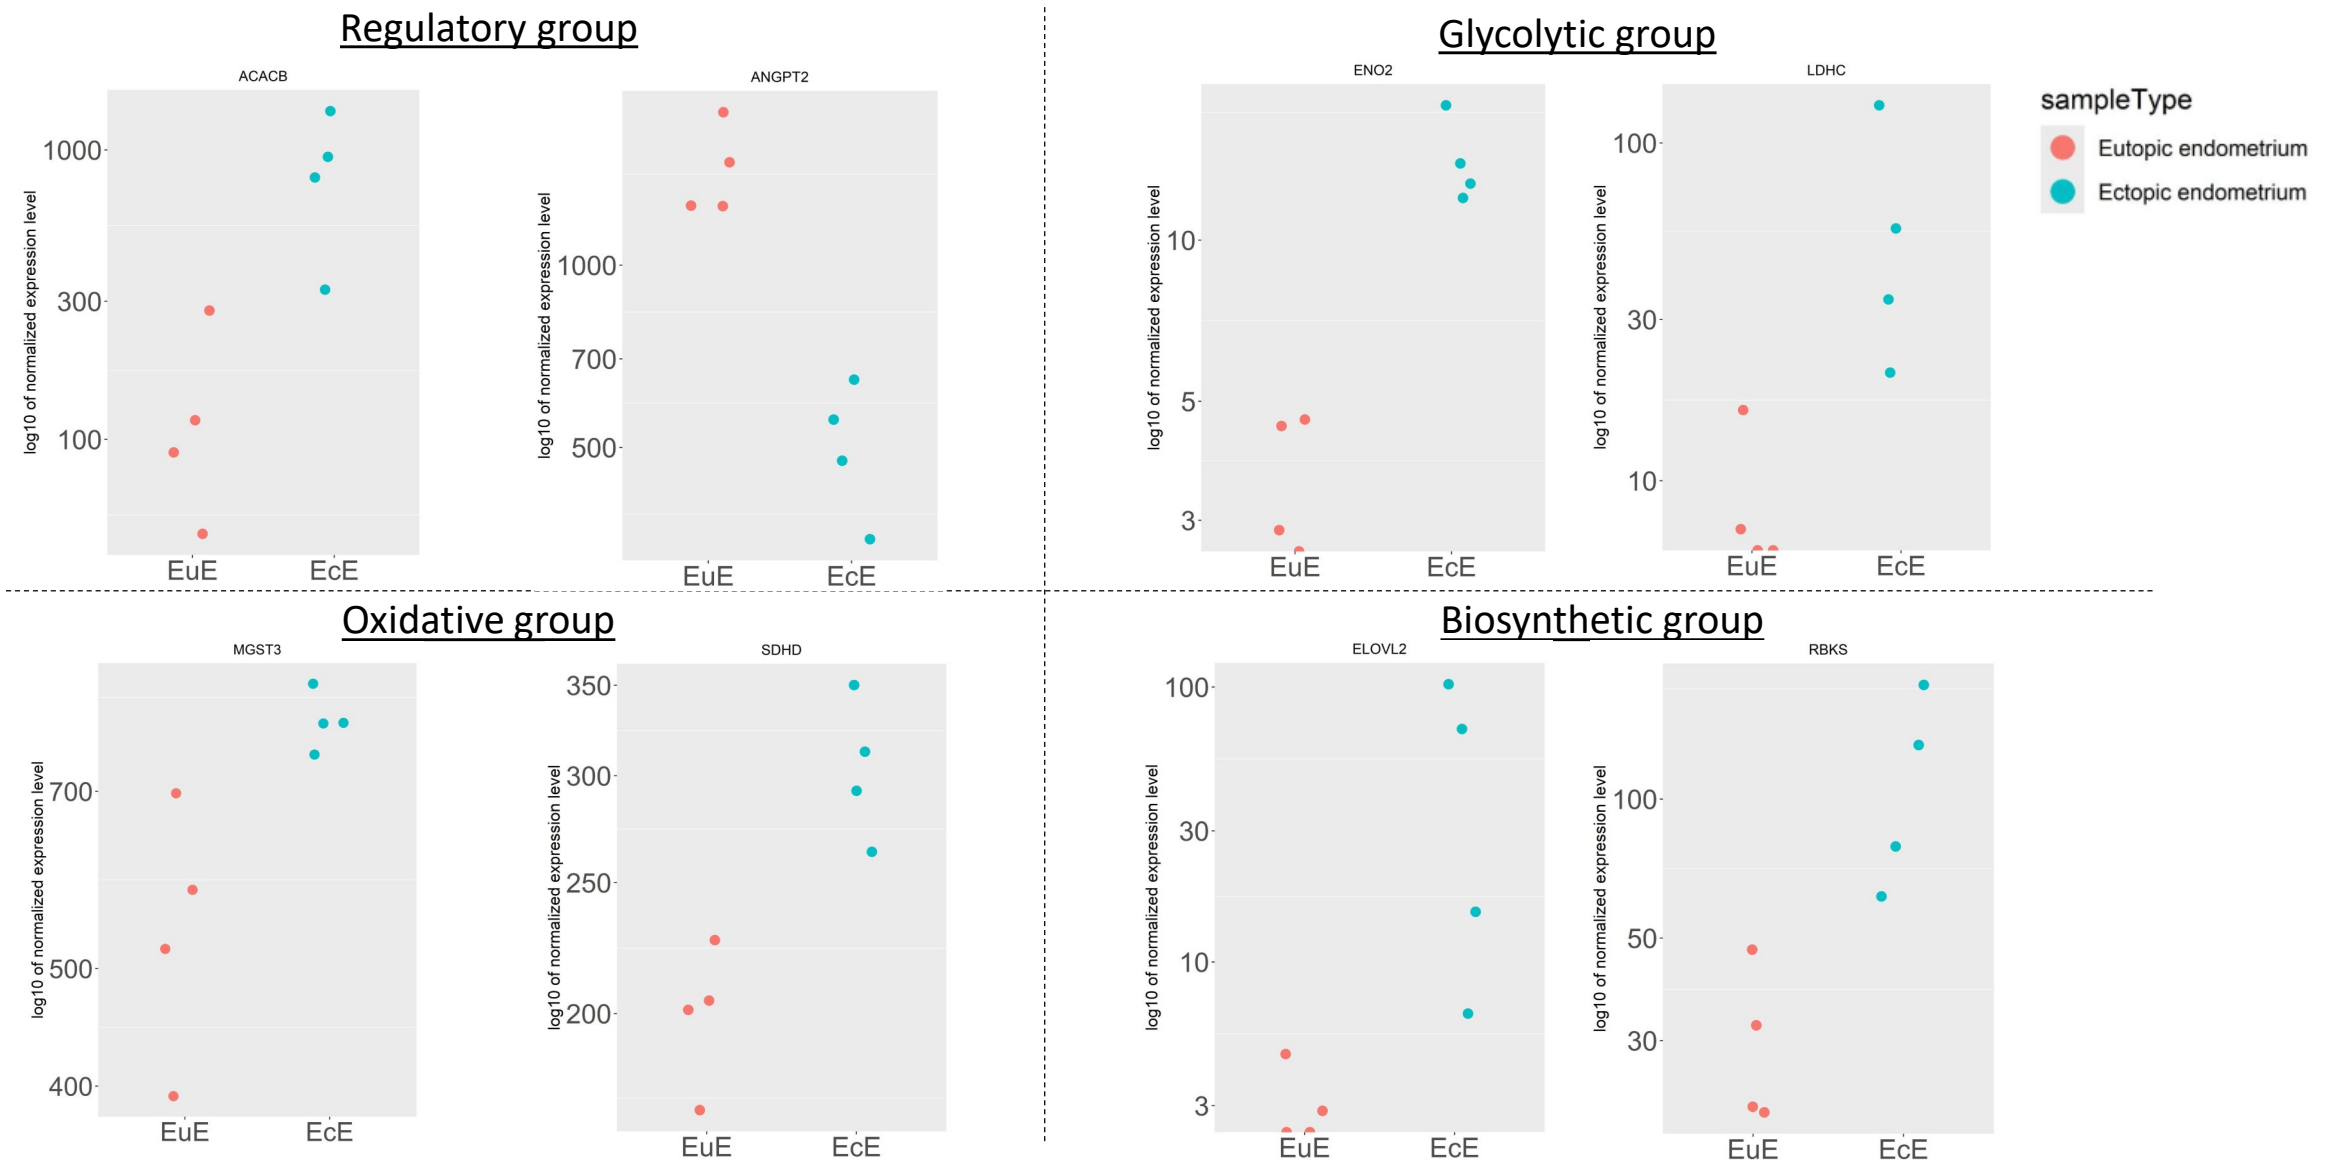

**Supplementary Figure 7.** Dot-plots of representative metabolic DEGs ( $p_{adj} < 0.05$ ,  $\log_{10}$  of normalised expression level) from four main metabolic groups (Regulatory pathways, Glycolytic metabolism, Oxidative metabolism and Biosynthetic pathways, from Table 2 in the manuscript), illustrating the level of expression in **endothelial** cells across eutopic (EuE, N = 4, red dots) and ectopic (EcE, N = 4, blue dots) endometrial samples.



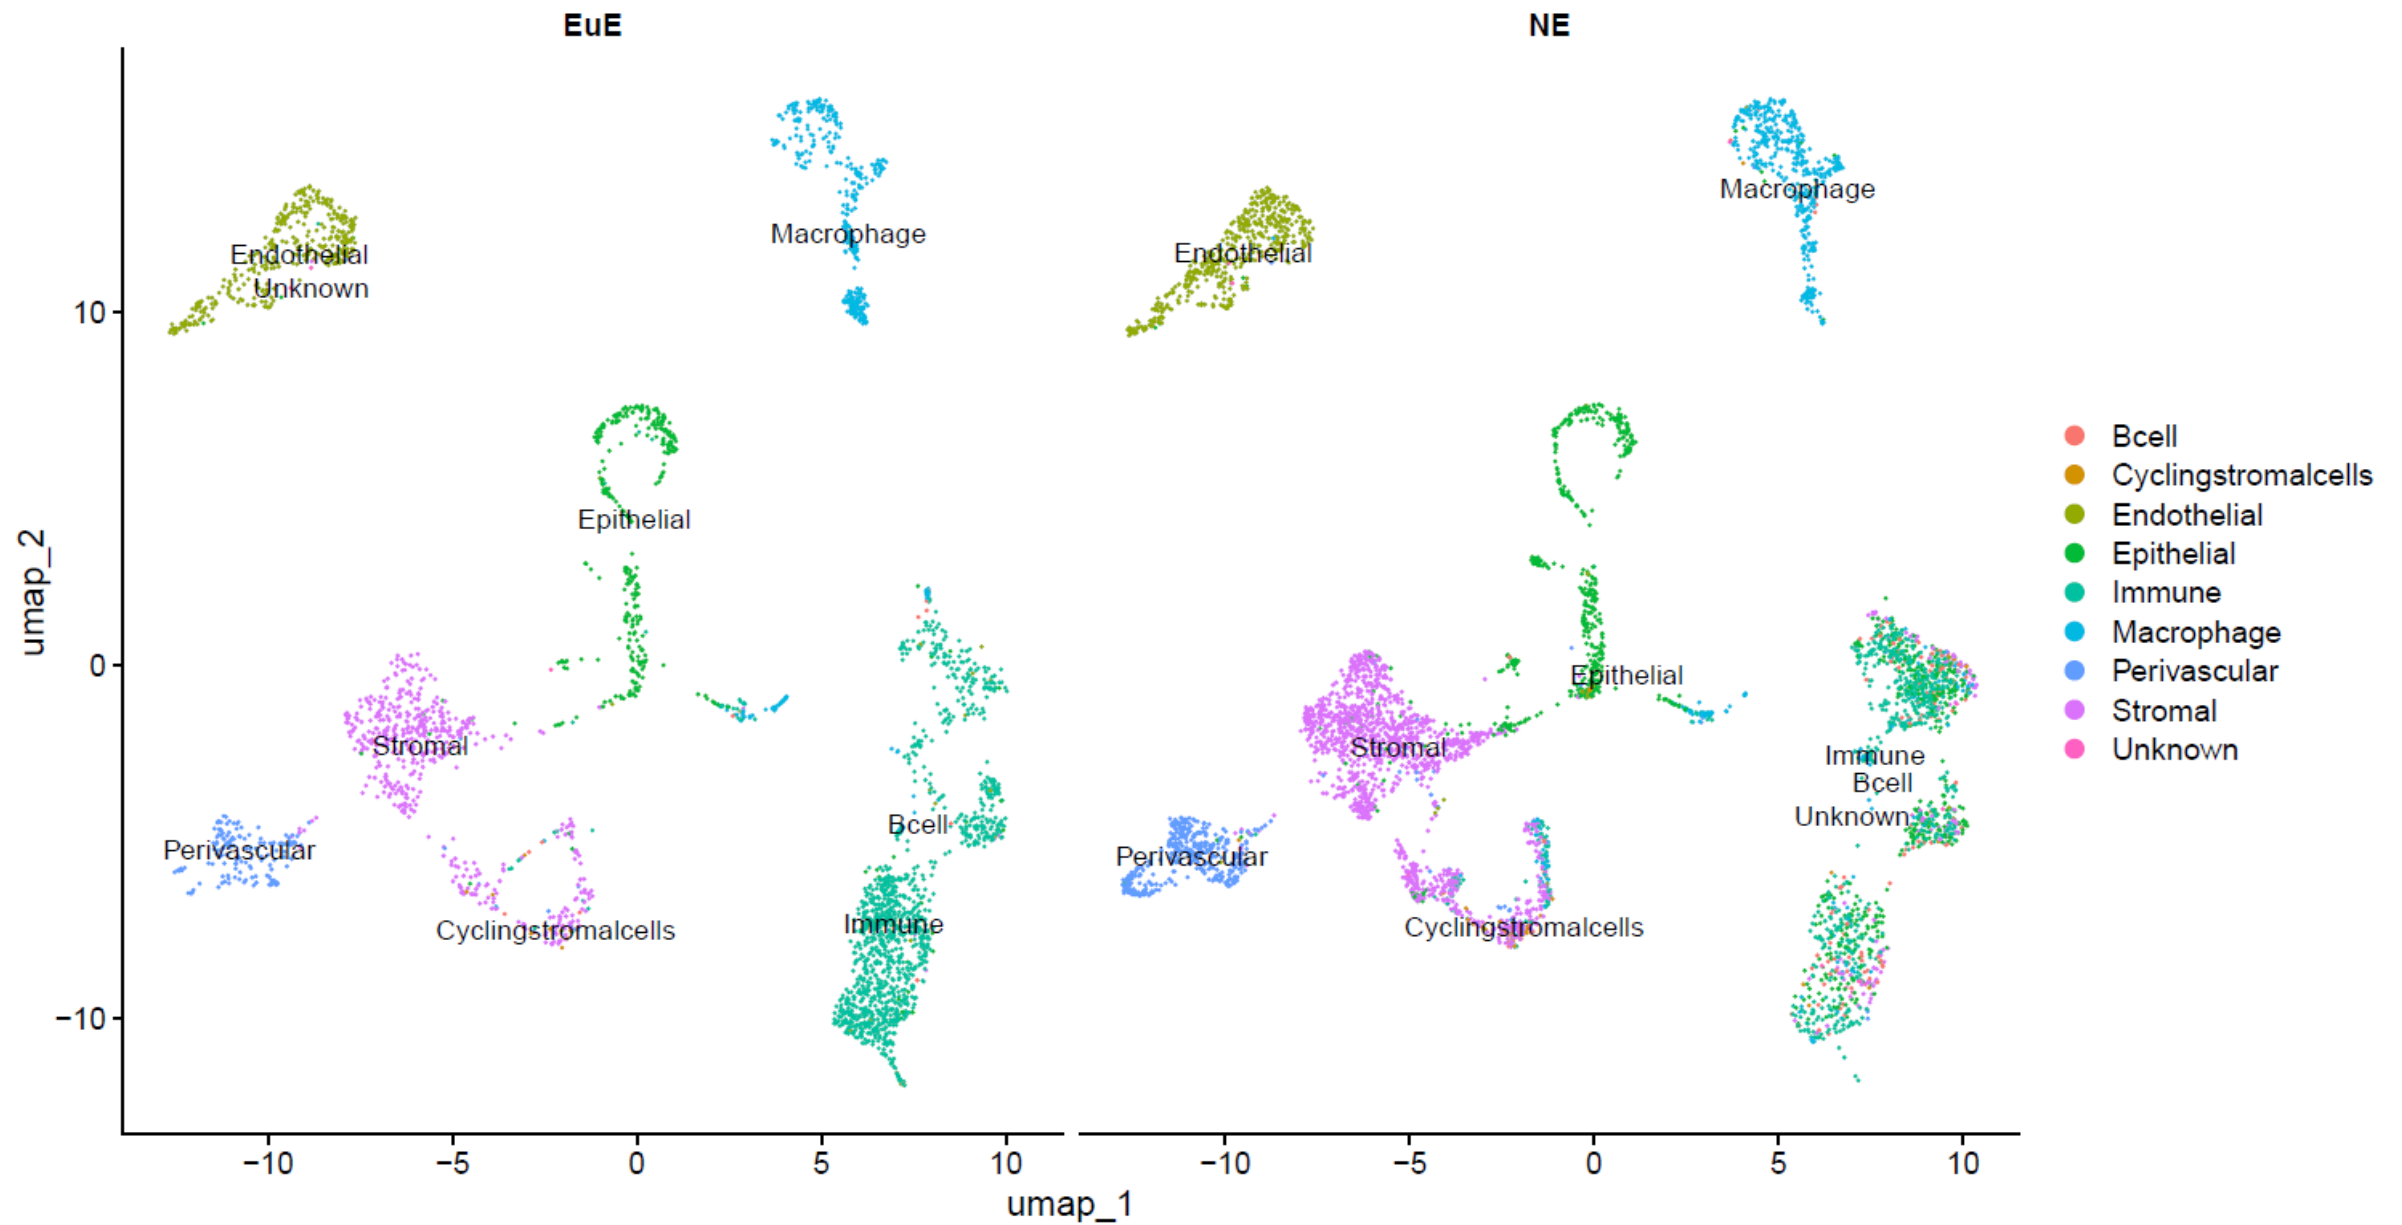

**Supplementary Figure 8.** UMAP of 9 major clusters identified in the eutopic endometrium (EuE, on the left side) and controls (NE, on the right side) from the external dataset (Huang et al. 2023).

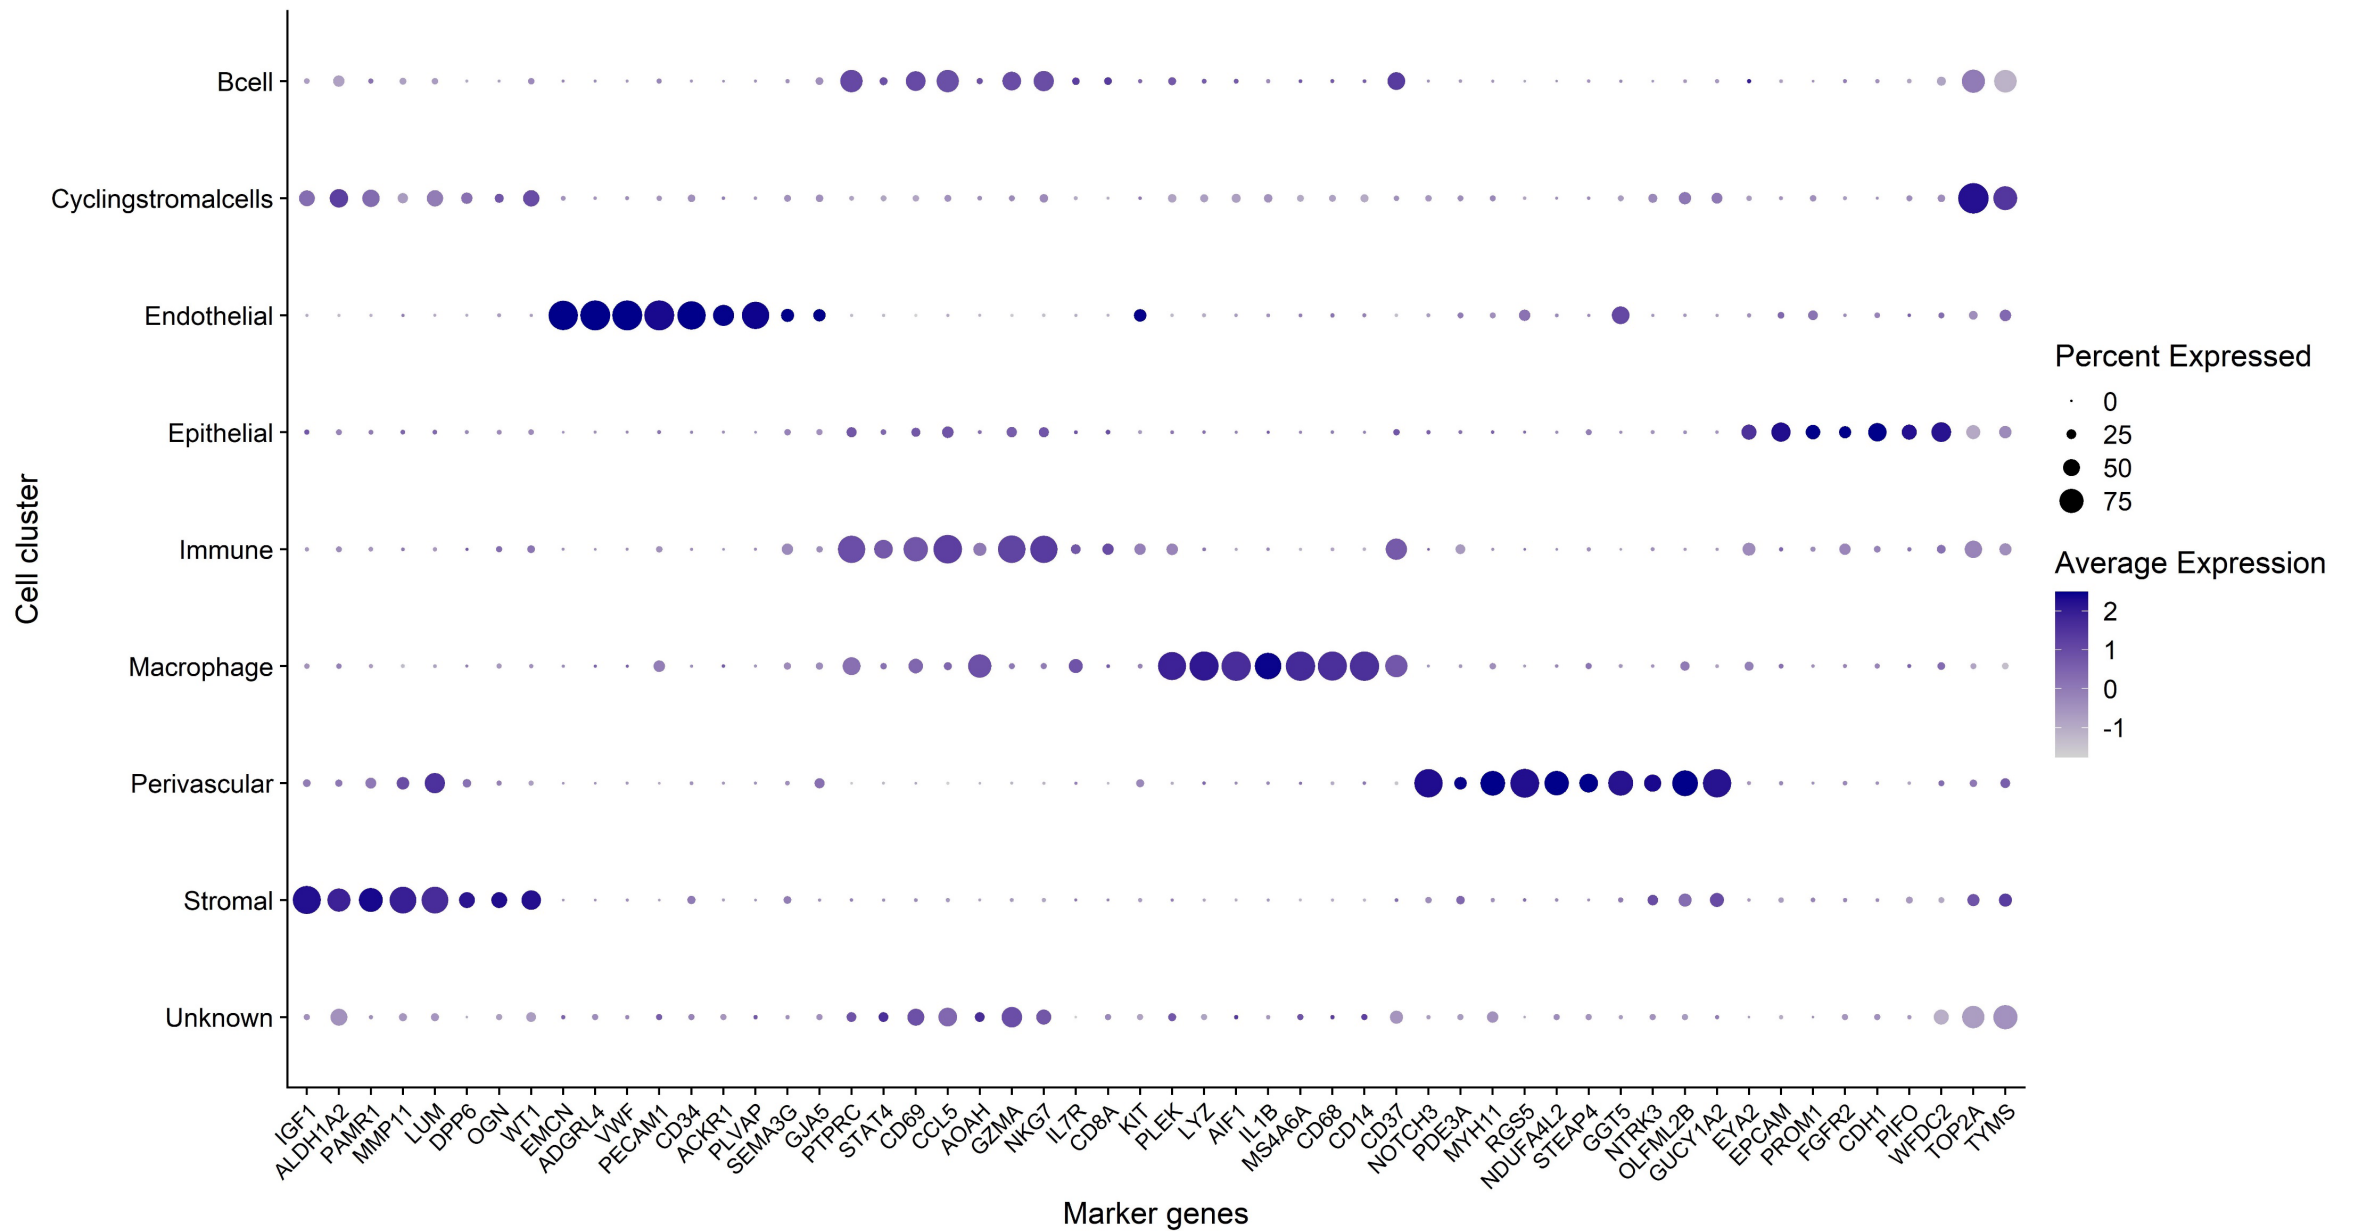

**Supplementary Figure 9.** Differentially expressed gene markers in 9 major clusters identified in the eutopic endometrium from women with endometriosis and controls from the external dataset (Huang et al. 2023). Each dot shows the average gene expression and percent expressed. Each cluster exhibited the expression of cell-type representative marker genes.

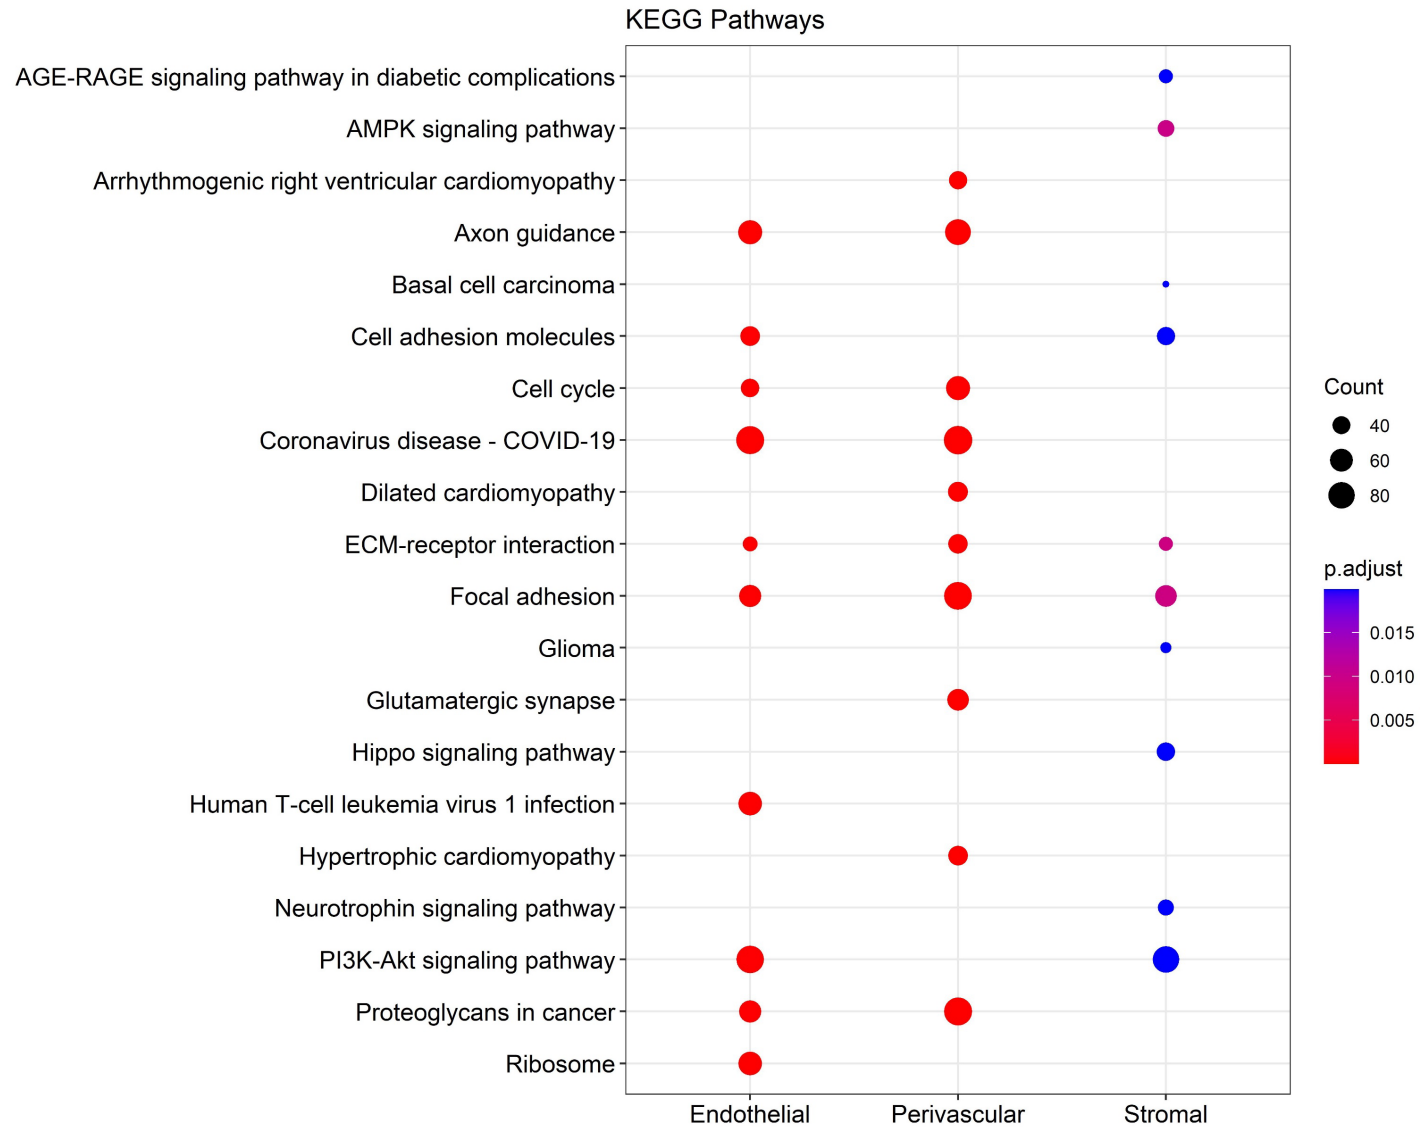

**Supplementary Figure 10.** Top 10 enriched KEGG pathways in perivascular, stromal and endothelial cell populations of ectopic endometrium compared to eutopic endometrium.

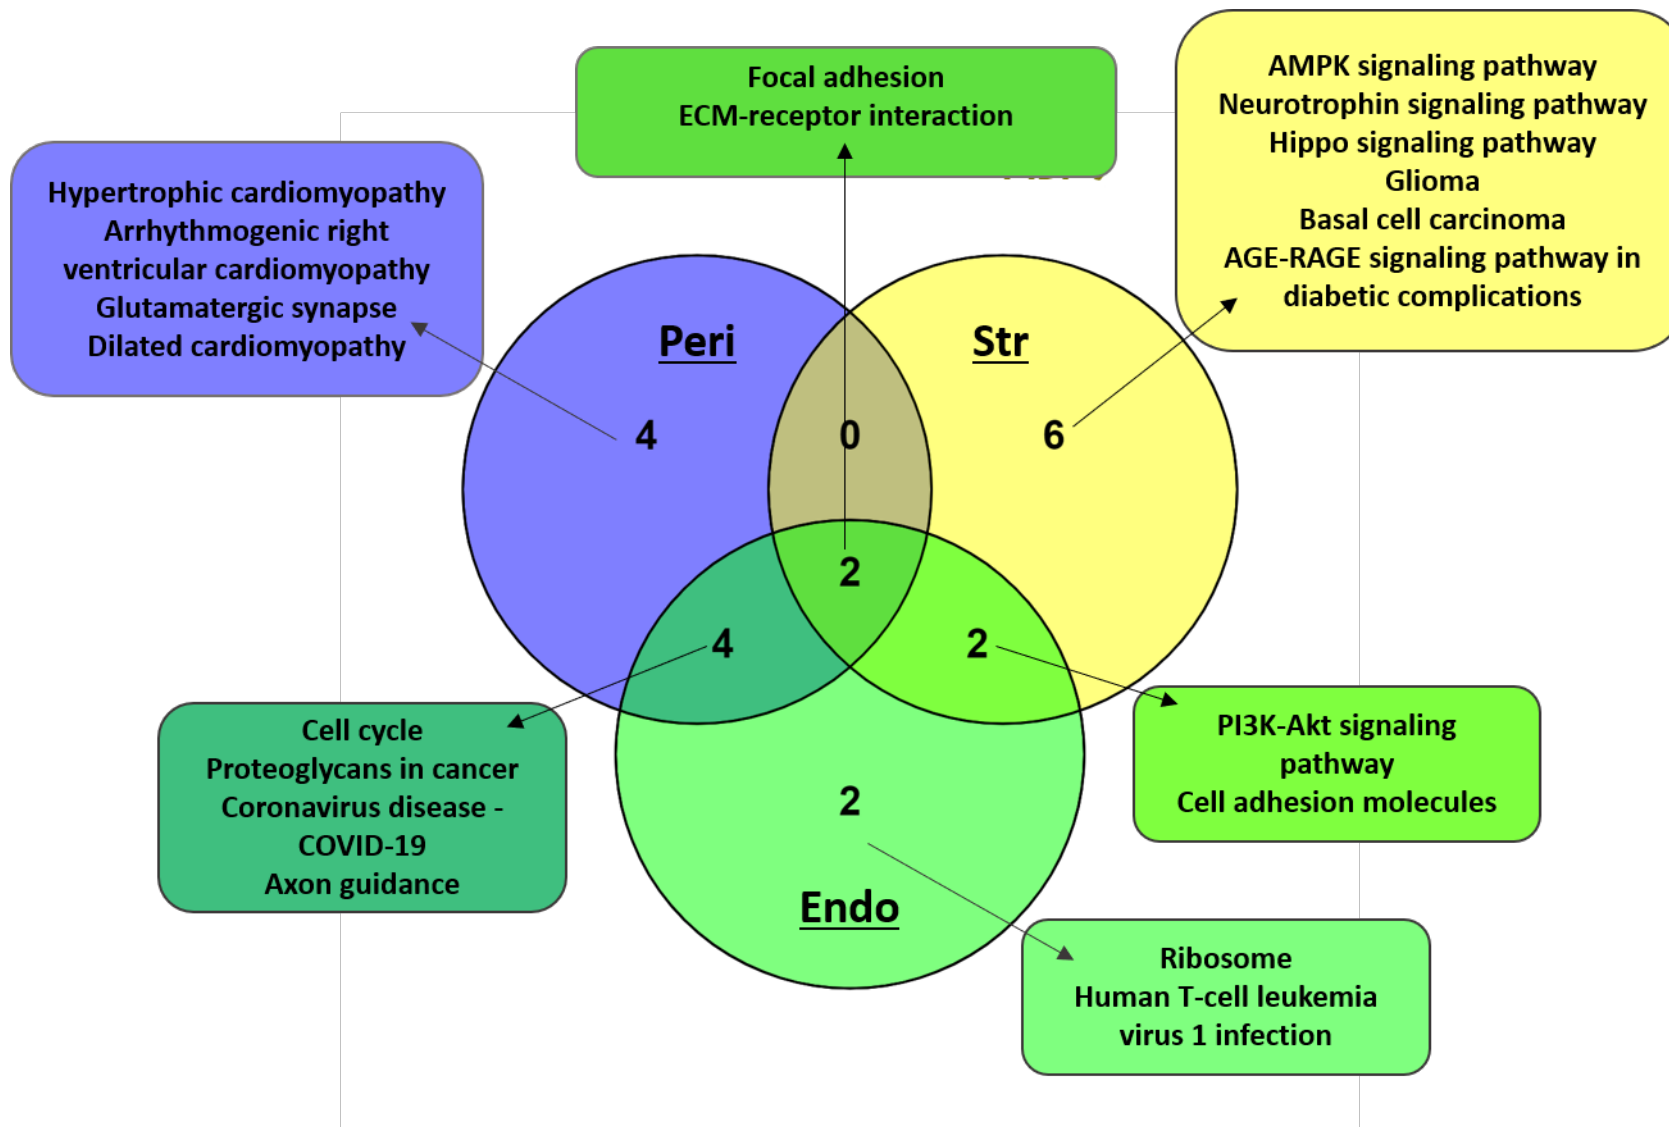

**Supplementary Figure 11.** Venn diagram of top 10 enriched KEGG pathways in perivascular, stromal and endothelial cell populations of ectopic endometrium compared to eutopic endometrium.

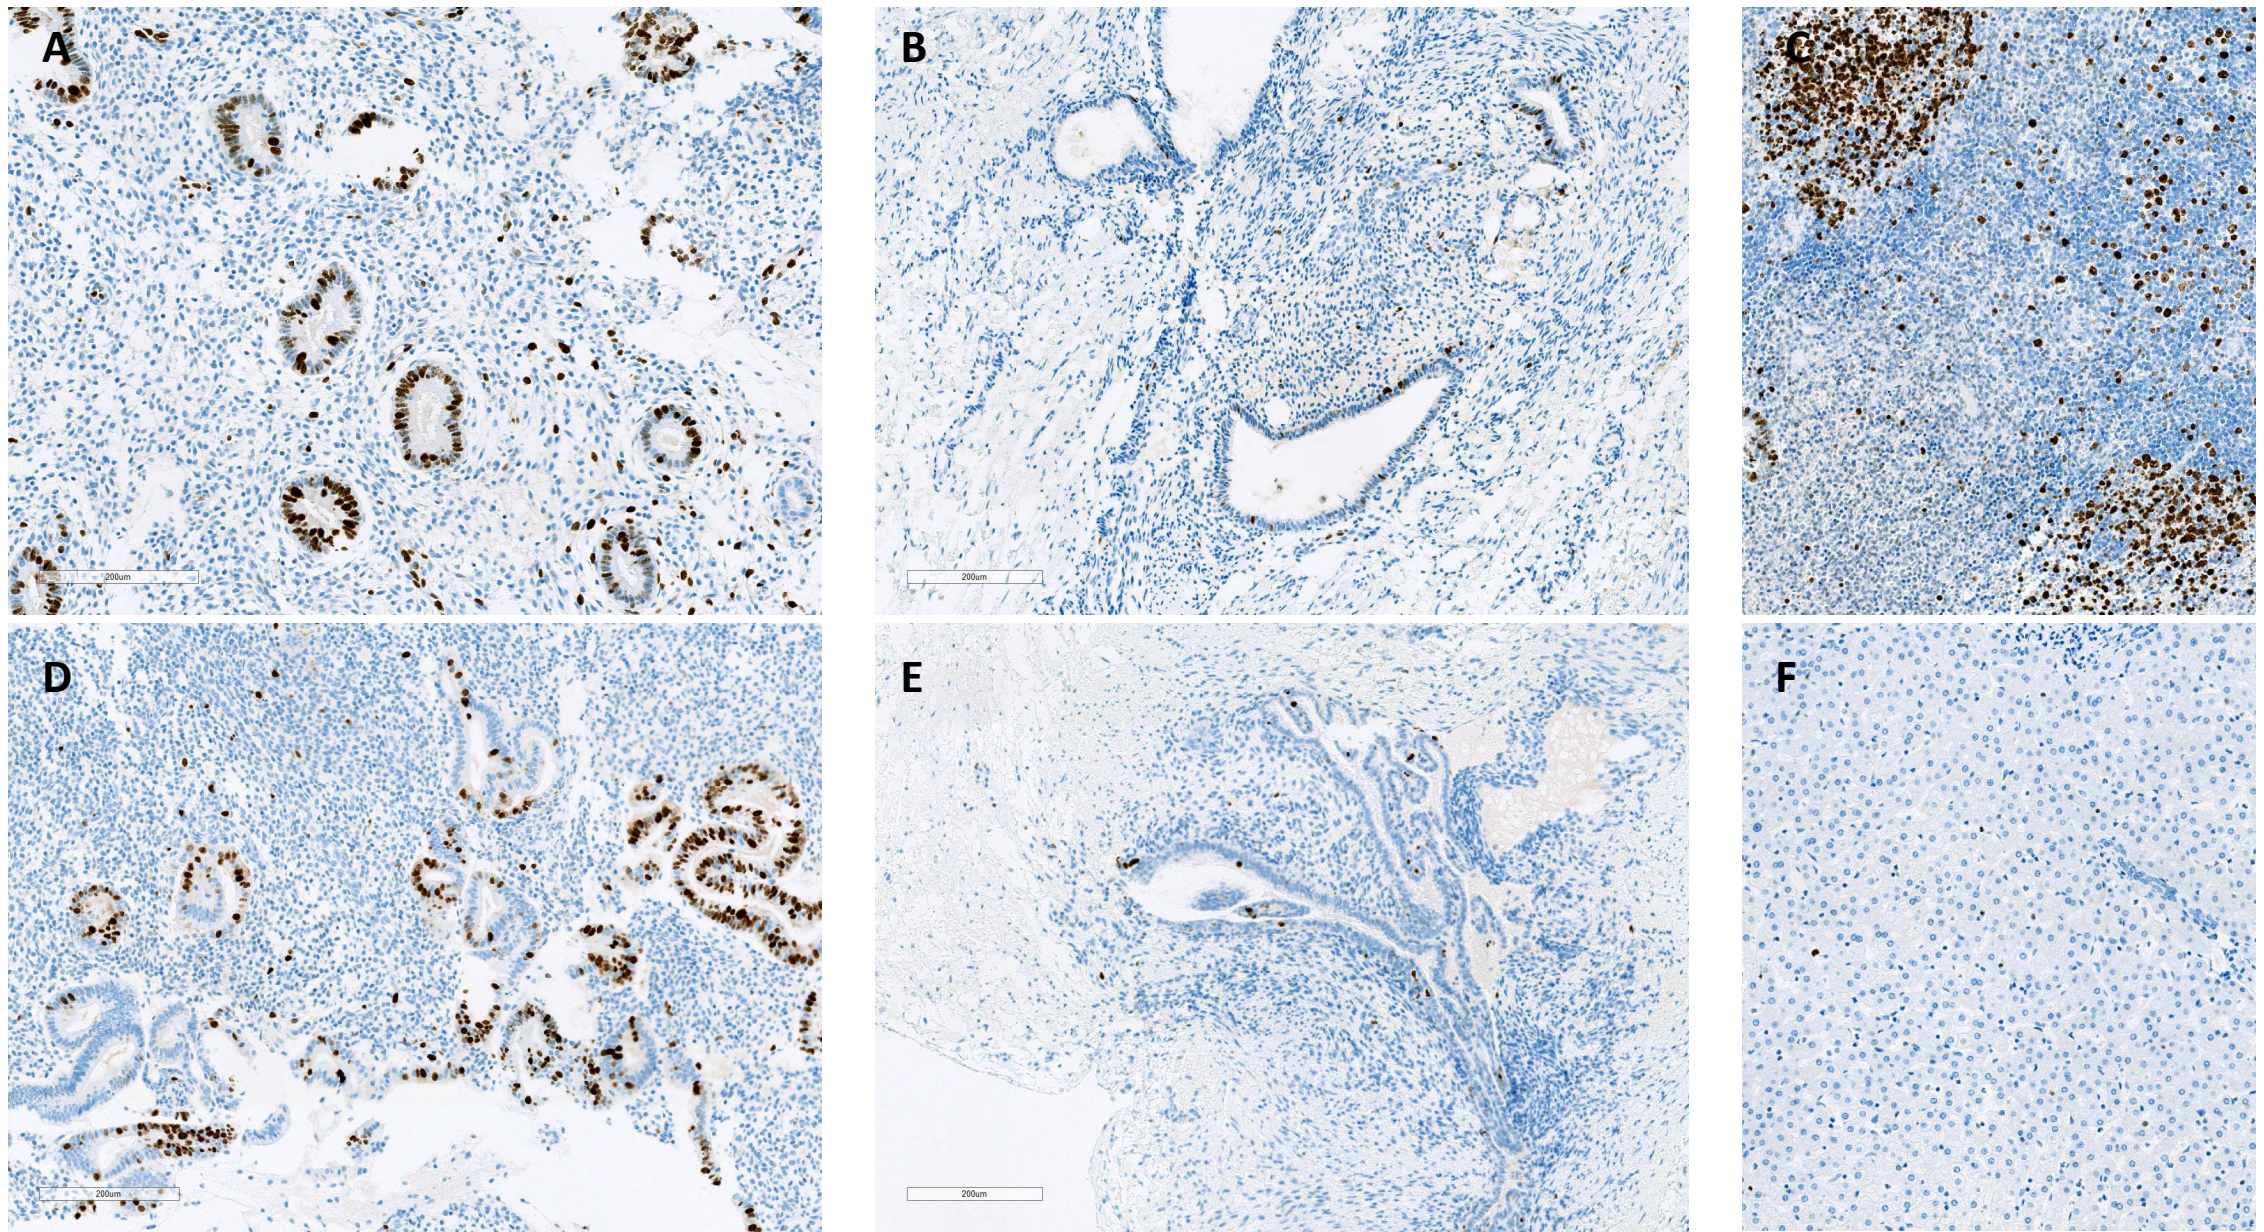

**Supplementary Figure 12.** Representative images of Ki67 staining of eutopic endometrium (A, D) and ectopic endometrium (peritoneal lesion, B, E) from patients with endometriosis, showing higher expression of Ki67 proliferative marker in glands and stroma of eutopic endometrium compared to ectopic endometrium. Positive control (C, tonsil stroma) and a negative control (F, liver) for Ki67 staining. Scale bar 200 µm.

**A**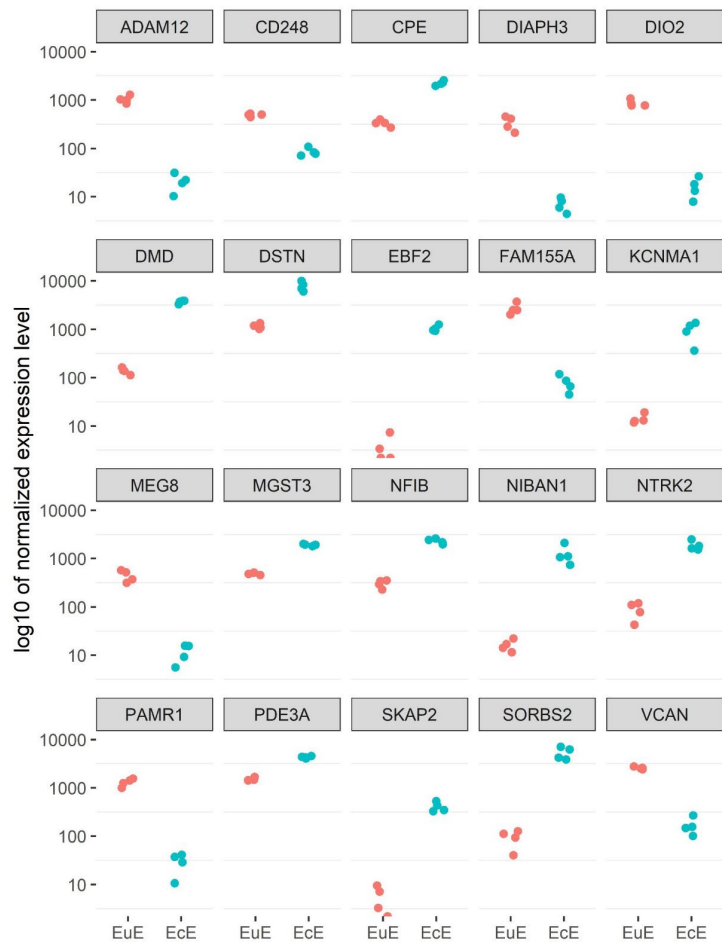**B**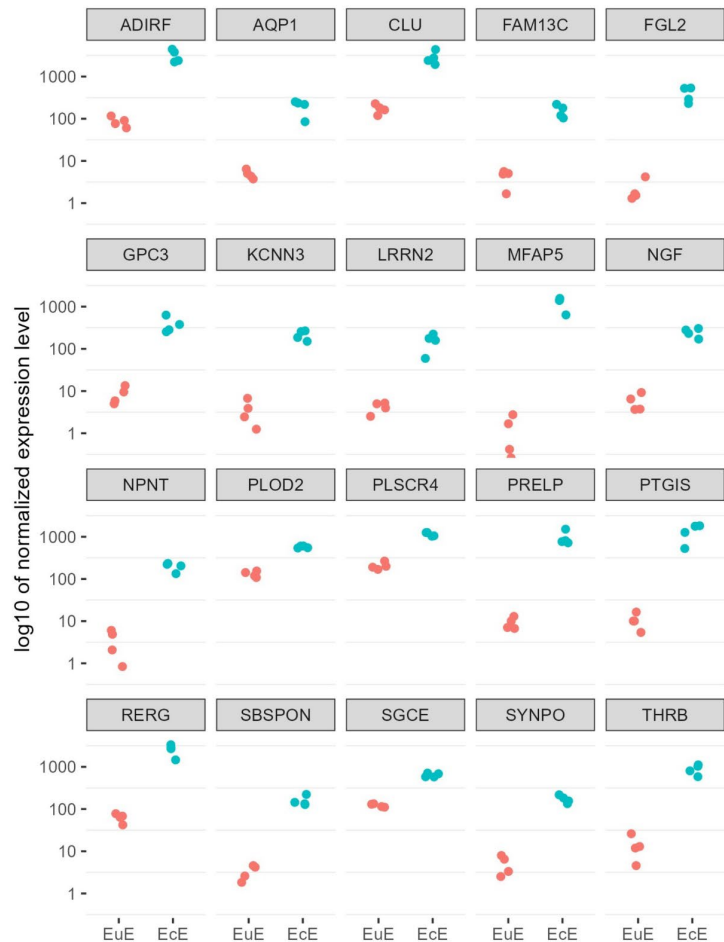**C**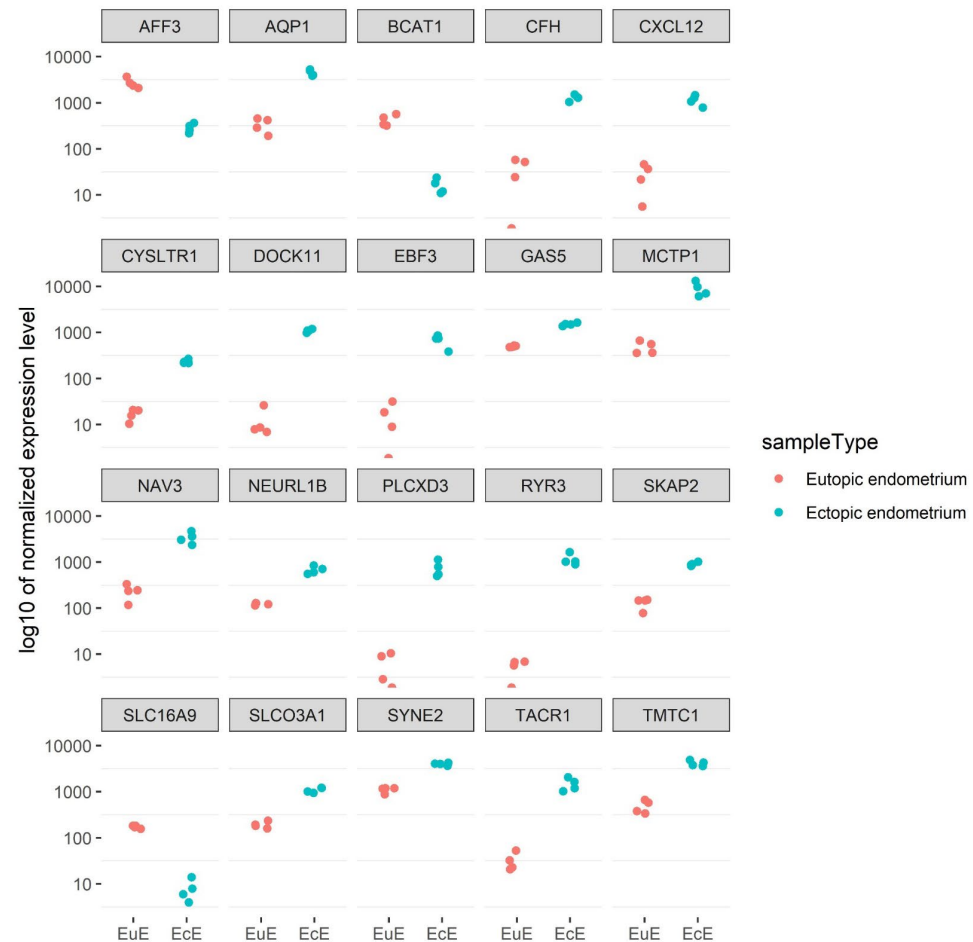

**Supplementary Figure 13.** Top 20 DEGs ( $p_{adj} < 0.05$ ,  $\log_2$  of normalised expression level) of perivascular (A), stromal (B) and endothelial (C) populations. The samples of Eutopic endometrium (EuE) – in red, ectopic endometrium (EcE) – in blue.

## Perivascular

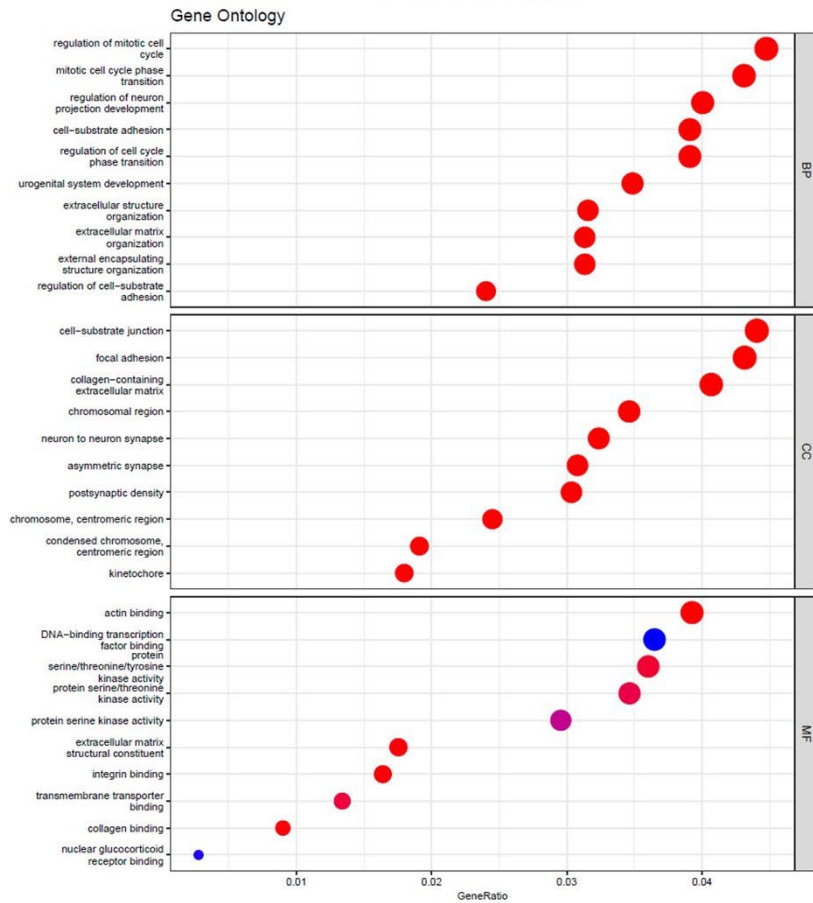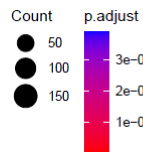

## Stromal

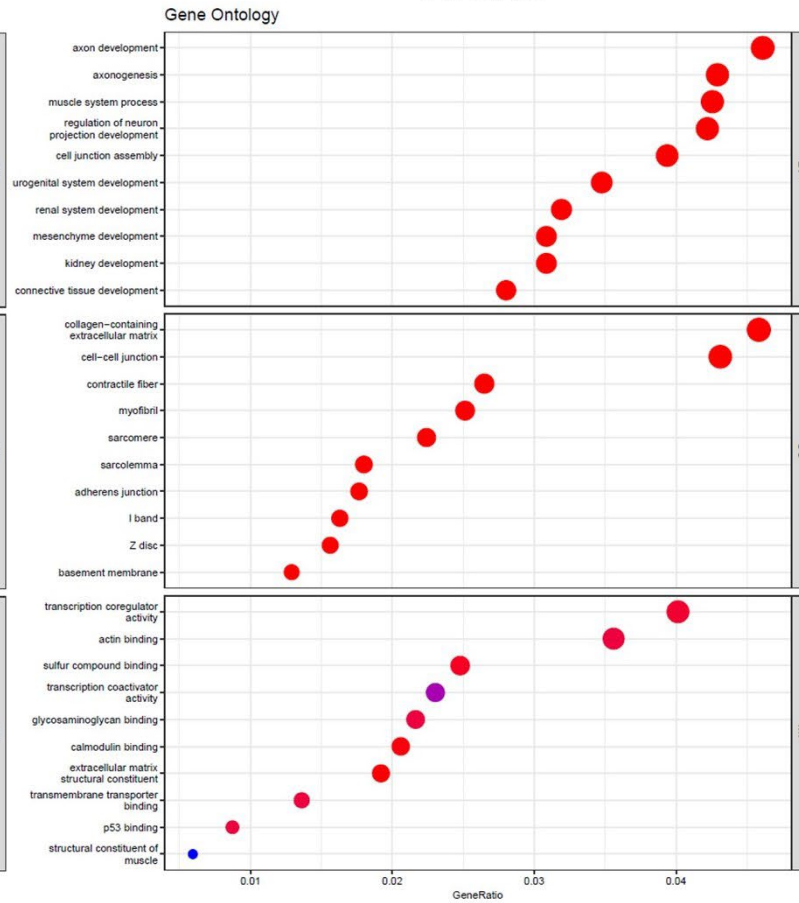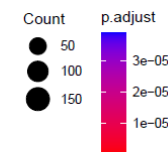

## Endothelial

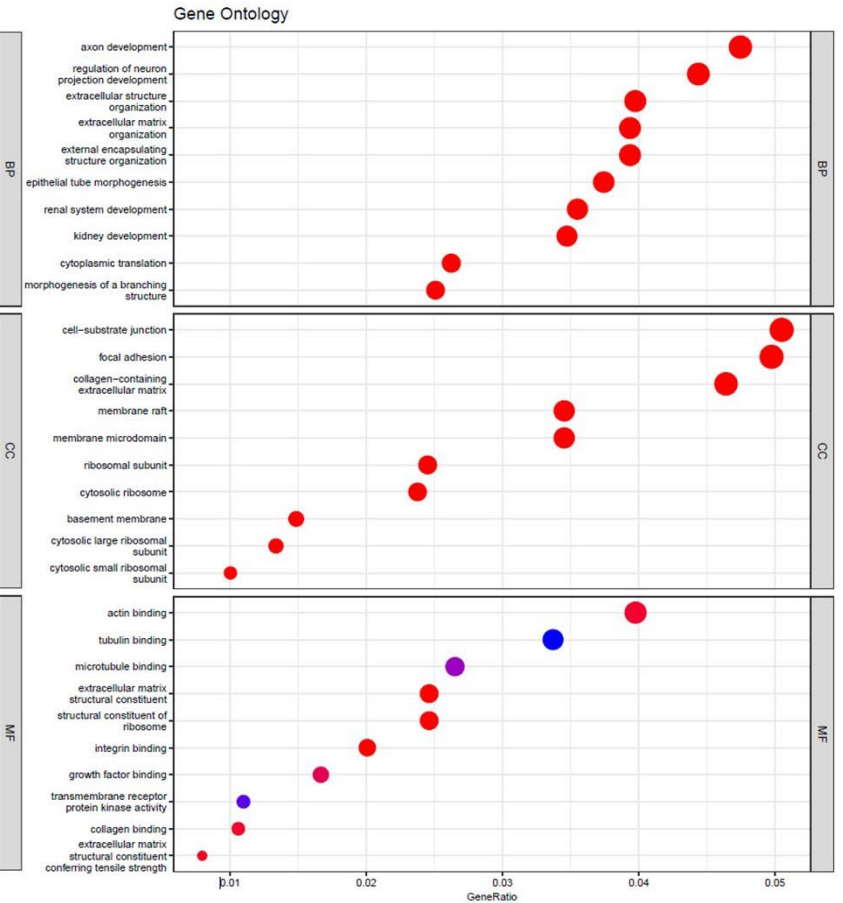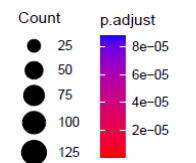

**Supplementary Figure 14.** GO enrichment analysis with the top 10 biological process (BP), molecular function (MF) and cell compartment (CC) for perivascular, stromal and endothelial cell types.

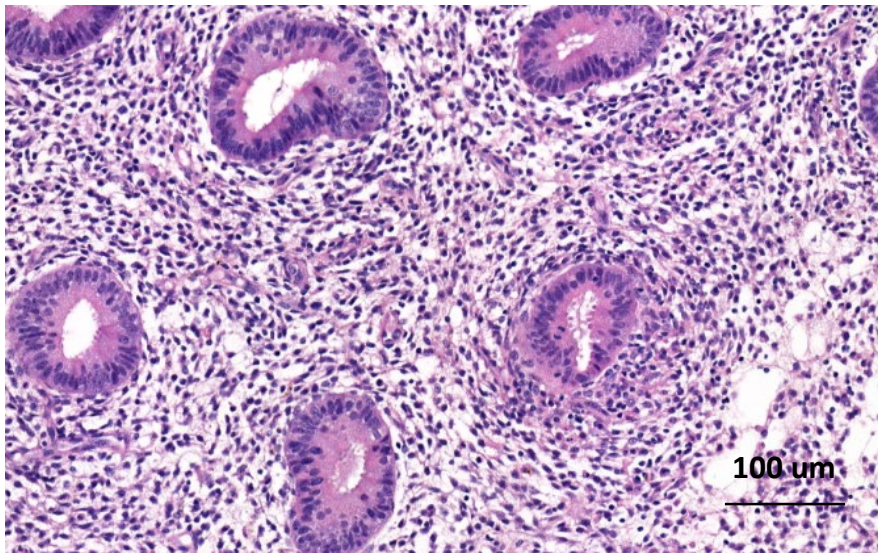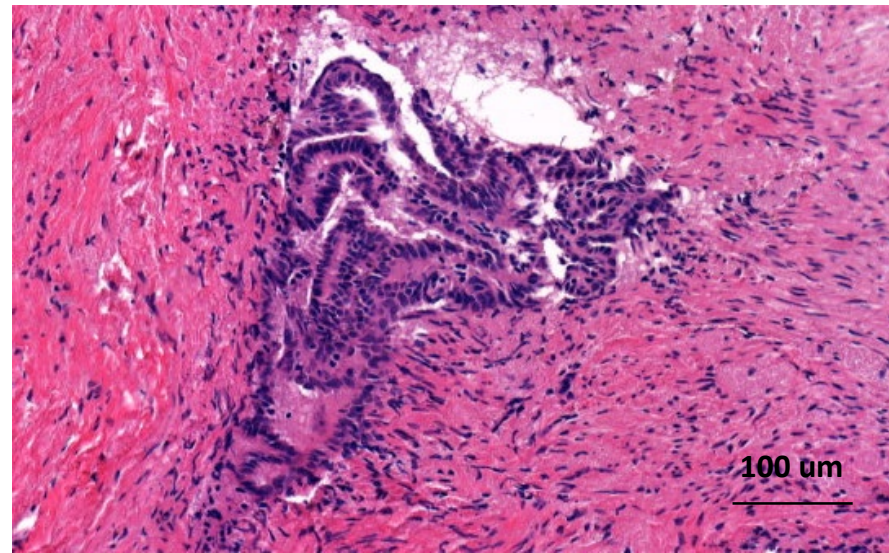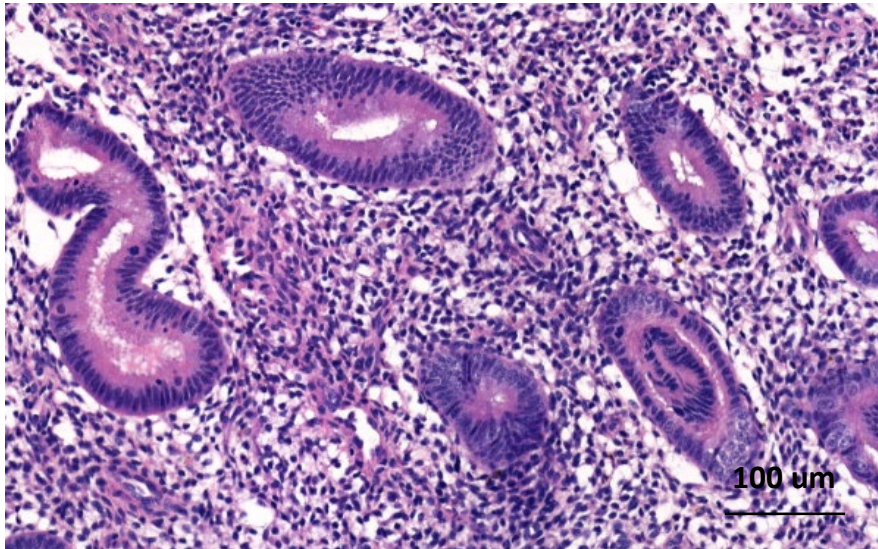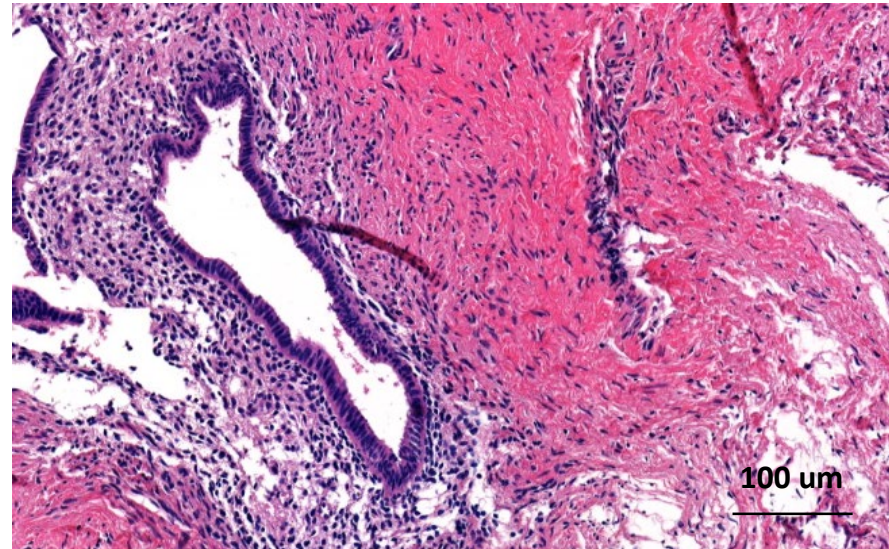

**Supplementary Figure 15.** Representative images of haematoxylin and eosin staining of eutopic endometrium (left images) and ectopic endometrium (peritoneal lesion, right images) from two patients (upper images and lower images) with endometriosis, showing morphological differences between paired eutopic and ectopic endometrial tissues. Scale bar 100  $\mu\text{m}$ .



**Supplementary Table 1. Total cell counts and percentages for all clusters in ectopic endometrium (EcE) and eutopic endometrium (EuE). Fisher's exact test was used to compare cell cluster proportions between EcE and EuE.**

| Cluster, cell count (%)  | Stromal      | Endothelial  | Immune       | Perivascular | Macrophage  |
|--------------------------|--------------|--------------|--------------|--------------|-------------|
| EcE                      | 1248 (16.6%) | 1630 (21.6%) | 1785 (23.7%) | 1959 (26.0%) | 380 (5.0%)  |
| EuE                      | 4284 (58.9%) | 335 (4.6%)   | 1314 (18.2%) | 527 (7.2%)   | 143 (2.0 %) |
| Fisher's exact (P value) | <1.13E-103   | <1.13E-103   | 5.56E-33     | <1.13E-103   | 5.93E-50    |

| Cluster, cell count (%)  | Unknown     | B cell     | Epithelial | Cycling stromal | Total count |
|--------------------------|-------------|------------|------------|-----------------|-------------|
| EcE                      | 230 (3.1%)  | 281 (3.7%) | 22 (0.3%)  | 3 (0%)          | 7538        |
| EuE                      | 177 (2.4%)  | 67 (0.9%)  | 241 (3.3%) | 191 (2.6%)      | 7279        |
| Fisher's exact (P value) | 0.000262437 | 7.39E-63   | 1.03E-93   | 1.13E-103       |             |

**Supplementary Table 2. Analysis of differential expression of 12 metabolic pathways between ectopic endometrium (EcE) and eutopic endometrium (EuE). Numbers of differentially expressed genes of metabolic pathways and percentages of the genes calculated to the total N of genes in a pathway.**

| Metabolic Pathways           | Total N of genes in a pathway | Perivascular, N (%) | Stromal, N (%) | Endothelial, N (%) | Immune, N (%) |
|------------------------------|-------------------------------|---------------------|----------------|--------------------|---------------|
| ALA, AST and GLU metabolism  | 37                            | 9 (24.3%)           | 2 (5.4%)       | 7 (18.9%)          | 0             |
| AMPK signaling pathway       | 121                           | 39 (32.2%)          | 35 (28.9%)     | 23 (19.0%)         | 3 (2.5%)      |
| Citrate cycle (TCA cycle)    | 30                            | 10 (33.3%)          | 5 (16.7%)      | 3 (10.0%)          | 0             |
| Fatty acid biosynthesis      | 18                            | 4 (22.2%)           | 1 (5.6%)       | 3 (16.7%)          | 0             |
| Fatty acid degradation       | 43                            | 18 (41.9%)          | 10 (23.3%)     | 2 (4.7%)           | 0             |
| Fatty acid elongation        | 27                            | 12 (44.4%)          | 7 (25.9%)      | 3 (11.1%)          | 0             |
| Glutathione metabolism       | 57                            | 16 (28.1%)          | 13 (22.8%)     | 12 (21.1%)         | 2 (3.5%)      |
| Glycolysis / Gluconeogenesis | 67                            | 21 (31.3%)          | 12 (17.9%)     | 7 (10.4%)          | 1 (1.5%)      |
| HIF-1 signaling pathway      | 109                           | 39 (35.8%)          | 22 (20.2%)     | 21 (19.3%)         | 6 (5.5%)      |
| Oxidative phosphorylation    | 134                           | 32 (23.9%)          | 10 (7.5%)      | 5 (3.7%)           | 0             |
| Pentose phosphate pathway    | 30                            | 11 (36.7%)          | 5 (16.7%)      | 3 (10.0%)          | 0             |
| Pyruvate metabolism          | 47                            | 16 (34.0%)          | 12 (25.5%)     | 5 (10.6%)          | 0             |

  

| Metabolic Pathways          | Total N of genes in a pathway | Cycling stromal, N (%) | Epithelial, N (%) | Unknown, N (%) | Macrophages, N (%) | B cells, N (%) |
|-----------------------------|-------------------------------|------------------------|-------------------|----------------|--------------------|----------------|
| ALA, AST and GLU metabolism | 37                            | 0                      | 1 (2.7%)          | 2 (5.4%)       | 0                  | 0              |
| AMPK signaling pathway      | 121                           | 6 (5%)                 | 0                 | 4 (3.3%)       | 0                  | 0              |
| Citrate cycle (TCA cycle)   | 30                            | 0                      | 0                 | 1 (3.3%)       | 0                  | 0              |
| Fatty acid biosynthesis     | 18                            | 0                      | 0                 | 1 (5.6%)       | 0                  | 0              |
| Fatty acid degradation      | 43                            | 0                      | 0                 | 0              | 0                  | 0              |
| Fatty acid elongation       | 27                            | 0                      | 0                 | 0              | 0                  | 0              |

|                              |     |          |          |          |   |   |
|------------------------------|-----|----------|----------|----------|---|---|
| Glutathione metabolism       | 57  | 1 (1.8%) | 0        | 4 (7%)   | 0 | 0 |
| Glycolysis / Gluconeogenesis | 67  | 0        | 0        | 1 (1.5%) | 0 | 0 |
| HIF-1 signaling pathway      | 109 | 3 (2.8%) | 2 (1.8%) | 8 (7.3%) | 0 | 0 |
| Oxidative phosphorylation    | 134 | 0        | 0        | 2 (1.5%) | 0 | 0 |
| Pentose phosphate pathway    | 30  | 0        | 0        | 0        | 0 | 0 |
| Pyruvate metabolism          | 47  | 0        | 0        | 0        | 0 | 0 |

**Supplementary Table 3. SCPA analysis of the activity of 12 metabolic pathways in ectopic endometrium vs eutopic endometrium (by cell clusters).**

Stromal

|    | Pathway                      | adjPval  | qval | FC    |
|----|------------------------------|----------|------|-------|
| 1  | HIF-1 signaling pathway      | 1.00E-52 | 7.2  | -2.35 |
| 2  | AMPK signaling pathway       | 2.37E-50 | 7.0  | -3.29 |
| 3  | Glutathione metabolism       | 3.55E-26 | 5.0  | 1.25  |
| 4  | Glycolysis / Gluconeogenesis | 3.71E-19 | 4.3  | 1.07  |
| 5  | Pyruvate metabolism          | 1.82E-14 | 3.7  | 1.81  |
| 6  | Fatty acid degradation       | 3.00E-13 | 3.5  | 1.80  |
| 7  | Fatty acid elongation        | 1.90E-08 | 2.8  | -0.30 |
| 8  | ALA, ASP and GLU metabolism  | 5.55E-08 | 2.7  | 0.22  |
| 9  | Oxidative phosphorylation    | 1.15E-06 | 2.4  | -2.50 |
| 10 | Pentose phosphate pathway    | 8.78E-01 | 0.2  | 0.31  |
| 11 | Citrate cycle (TCA cycle)    | 1.00E+00 | 0.0  | 0.27  |
| 12 | Fatty acid biosynthesis      | 1.00E+00 | 0.0  | 0.12  |

Endothelial

|    | Pathway                      | adjPval  | qval | FC    |
|----|------------------------------|----------|------|-------|
| 1  | HIF-1 signaling pathway      | 1.10E-57 | 7.5  | 3.19  |
| 2  | AMPK signaling pathway       | 9.41E-51 | 7.1  | 0.26  |
| 3  | Fatty acid elongation        | 8.12E-23 | 4.7  | 0.89  |
| 4  | Glutathione metabolism       | 8.12E-23 | 4.7  | -0.18 |
| 5  | ALA, ASP and GLU metabolism  | 2.27E-13 | 3.6  | 0.05  |
| 6  | Oxidative phosphorylation    | 4.80E-12 | 3.4  | 1.27  |
| 7  | Pyruvate metabolism          | 8.64E-11 | 3.2  | 0.15  |
| 8  | Citrate cycle (TCA cycle)    | 1.72E-08 | 2.8  | -0.35 |
| 9  | Glycolysis / Gluconeogenesis | 1.90E-07 | 2.6  | 0.52  |
| 10 | Fatty acid biosynthesis      | 1.54E-04 | 2.0  | 0.26  |
| 11 | Fatty acid degradation       | 5.69E-04 | 1.8  | -0.31 |
| 12 | Pentose phosphate pathway    | 4.40E-02 | 1.2  | 0.20  |

Immune

|    | Pathway                      | adjPval  | qval | FC    |
|----|------------------------------|----------|------|-------|
| 1  | HIF-1 signaling pathway      | 1.91E-10 | 3.1  | -0.80 |
| 2  | AMPK signaling pathway       | 2.80E-01 | 0.7  | -0.08 |
| 3  | ALA, ASP and GLU metabolism  | 1.00E+00 | 0.0  | 0.04  |
| 4  | Citrate cycle (TCA cycle)    | 1.00E+00 | 0.0  | -0.43 |
| 5  | Fatty acid biosynthesis      | 1.00E+00 | 0.0  | -0.09 |
| 6  | Fatty acid degradation       | 1.00E+00 | 0.0  | -0.43 |
| 7  | Fatty acid elongation        | 1.00E+00 | 0.0  | -0.29 |
| 8  | Glutathione metabolism       | 1.00E+00 | 0.0  | -0.53 |
| 9  | Glycolysis / Gluconeogenesis | 1.00E+00 | 0.0  | -0.43 |
| 10 | Oxidative phosphorylation    | 1.00E+00 | 0.0  | -3.08 |
| 11 | Pentose phosphate pathway    | 1.00E+00 | 0.0  | -0.16 |
| 12 | Pyruvate metabolism          | 1.00E+00 | 0.0  | -0.39 |

Perivascular

|  | Pathway | adjPval | qval | FC |
|--|---------|---------|------|----|
|--|---------|---------|------|----|

|    |                              |          |     |       |
|----|------------------------------|----------|-----|-------|
| 1  | HIF-1 signaling pathway      | 1.67E-69 | 8.3 | -3.32 |
| 2  | AMPK signaling pathway       | 2.17E-56 | 7.5 | -3.52 |
| 3  | Glutathione metabolism       | 1.56E-51 | 7.1 | 0.06  |
| 4  | Oxidative phosphorylation    | 9.18E-29 | 5.3 | 7.12  |
| 5  | Glycolysis / Gluconeogenesis | 2.15E-16 | 4.0 | 0.21  |
| 6  | Pentose phosphate pathway    | 1.59E-11 | 3.3 | -0.29 |
| 7  | Pyruvate metabolism          | 5.59E-11 | 3.2 | 0.38  |
| 8  | Fatty acid elongation        | 1.91E-10 | 3.1 | -0.08 |
| 9  | Fatty acid degradation       | 6.32E-10 | 3.0 | 0.72  |
| 10 | Citrate cycle (TCA cycle)    | 1.15E-06 | 2.4 | 0.02  |
| 11 | ALA, ASP and GLU metabolism  | 3.76E-03 | 1.6 | -0.21 |
| 12 | Fatty acid biosynthesis      | 1.14E-01 | 1.0 | -0.52 |

#### Macrophage

|    | Pathway                      | adjPval  | qval | FC    |
|----|------------------------------|----------|------|-------|
| 1  | HIF-1 signaling pathway      | 5.70E-10 | 3.0  | 2.49  |
| 2  | AMPK signaling pathway       | 5.12E-05 | 2.1  | 1.95  |
| 3  | Fatty acid biosynthesis      | 5.87E-02 | 1.1  | 1.15  |
| 4  | Fatty acid degradation       | 9.11E-02 | 1.0  | 0.78  |
| 5  | Glutathione metabolism       | 9.11E-02 | 1.0  | -0.58 |
| 6  | Oxidative phosphorylation    | 4.26E-01 | 0.6  | -1.80 |
| 7  | ALA, ASP and GLU metabolism  | 8.11E-01 | 0.3  | 0.31  |
| 8  | Pyruvate metabolism          | 8.11E-01 | 0.3  | -0.54 |
| 9  | Citrate cycle (TCA cycle)    | 1.00E+00 | 0.0  | -0.48 |
| 10 | Fatty acid elongation        | 1.00E+00 | 0.0  | -0.40 |
| 11 | Glycolysis / Gluconeogenesis | 1.00E+00 | 0.0  | -0.23 |
| 12 | Pentose phosphate pathway    | 1.00E+00 | 0.0  | 0.18  |

#### Unknown

|    | Pathway                      | adjPval  | qval | FC     |
|----|------------------------------|----------|------|--------|
| 1  | AMPK signaling pathway       | 1.82E-05 | 2.2  | -7.62  |
| 2  | HIF-1 signaling pathway      | 1.82E-05 | 2.2  | -6.14  |
| 3  | Glutathione metabolism       | 8.22E-04 | 1.8  | -2.80  |
| 4  | Pyruvate metabolism          | 6.81E-02 | 1.1  | -2.83  |
| 5  | Glycolysis / Gluconeogenesis | 5.61E-01 | 0.5  | -3.24  |
| 6  | ALA, ASP and GLU metabolism  | 1.00E+00 | 0.0  | -0.66  |
| 7  | Citrate cycle (TCA cycle)    | 1.00E+00 | 0.0  | -1.68  |
| 8  | Fatty acid biosynthesis      | 1.00E+00 | 0.0  | -0.49  |
| 9  | Fatty acid degradation       | 1.00E+00 | 0.0  | -1.84  |
| 10 | Fatty acid elongation        | 1.00E+00 | 0.0  | -1.13  |
| 11 | Oxidative phosphorylation    | 1.00E+00 | 0.0  | -15.65 |
| 12 | Pentose phosphate pathway    | 1.00E+00 | 0.0  | -0.81  |

#### B-cell

|   | Pathway                     | adjPval  | qval | FC    |
|---|-----------------------------|----------|------|-------|
| 1 | HIF-1 signaling pathway     | 3.57E-02 | 1.2  | 0.87  |
| 2 | AMPK signaling pathway      | 1.42E-01 | 0.9  | -0.77 |
| 3 | ALA, ASP and GLU metabolism | 1.00E+00 | 0.0  | -0.50 |

|    |                              |          |     |       |
|----|------------------------------|----------|-----|-------|
| 4  | Citrate cycle (TCA cycle)    | 1.00E+00 | 0.0 | 0.07  |
| 5  | Fatty acid biosynthesis      | 1.00E+00 | 0.0 | 0.25  |
| 6  | Fatty acid degradation       | 1.00E+00 | 0.0 | 0.26  |
| 7  | Fatty acid elongation        | 1.00E+00 | 0.0 | 0.02  |
| 8  | Glutathione metabolism       | 1.00E+00 | 0.0 | 0.24  |
| 9  | Glycolysis / Gluconeogenesis | 1.00E+00 | 0.0 | 0.03  |
| 10 | Oxidative phosphorylation    | 1.00E+00 | 0.0 | -2.26 |
| 11 | Pentose phosphate pathway    | 1.00E+00 | 0.0 | -0.12 |
| 12 | Pyruvate metabolism          | 1.00E+00 | 0.0 | 0.50  |

#### Epithelial

|    | Pathway                      | adjPval  | qval | FC    |
|----|------------------------------|----------|------|-------|
| 1  | HIF-1 signaling pathway      | 7.09E-11 | 3.2  | 3.41  |
| 2  | AMPK signaling pathway       | 4.67E-05 | 2.1  | -4.02 |
| 3  | ALA, ASP and GLU metabolism  | 4.67E-05 | 2.1  | 0.99  |
| 4  | Fatty acid elongation        | 3.72E-02 | 1.2  | 1.57  |
| 5  | Glutathione metabolism       | 1.85E-01 | 0.9  | 1.31  |
| 6  | Oxidative phosphorylation    | 1.85E-01 | 0.9  | 11.47 |
| 7  | Citrate cycle (TCA cycle)    | 1.00E+00 | 0.0  | 0.92  |
| 8  | Fatty acid biosynthesis      | 1.00E+00 | 0.0  | -0.45 |
| 9  | Fatty acid degradation       | 1.00E+00 | 0.0  | 0.89  |
| 10 | Glycolysis / Gluconeogenesis | 1.00E+00 | 0.0  | 3.14  |
| 11 | Pentose phosphate pathway    | 1.00E+00 | 0.0  | 0.50  |
| 12 | Pyruvate metabolism          | 1.00E+00 | 0.0  | 1.88  |

#### Cycling Stromal

|    | Pathway                      | adjPval  | qval | FC   |
|----|------------------------------|----------|------|------|
| 1  | HIF-1 signaling pathway      | 1.05E-14 | 3.7  | 9.10 |
| 2  | AMPK signaling pathway       | 1.00E+00 | 0.0  | 0.92 |
| 3  | ALA, ASP and GLU metabolism  | 1.00E+00 | 0.0  | 0.13 |
| 4  | Citrate cycle (TCA cycle)    | 1.00E+00 | 0.0  | 0.53 |
| 5  | Fatty acid biosynthesis      | 1.00E+00 | 0.0  | 0.18 |
| 6  | Fatty acid degradation       | 1.00E+00 | 0.0  | 3.31 |
| 7  | Fatty acid elongation        | 1.00E+00 | 0.0  | 2.16 |
| 8  | Glutathione metabolism       | 1.00E+00 | 0.0  | 0.26 |
| 9  | Glycolysis / Gluconeogenesis | 1.00E+00 | 0.0  | 3.48 |
| 10 | Oxidative phosphorylation    | 1.00E+00 | 0.0  | 0.25 |
| 11 | Pentose phosphate pathway    | 1.00E+00 | 0.0  | 0.42 |
| 12 | Pyruvate metabolism          | 1.00E+00 | 0.0  | 0.82 |

**Supplementary Table 4. Statistically significant differentially expressed genes of metabolic pathways between eutopic endometrium of controls (women without endometriosis) compared to eutopic endometrium of women with endometriosis from external dataset (Huang et al. 2023).**

Perivascular cell type

| gene  | log2FoldChange | pvalue   | padj     | gene name                            | KEGG pathway | Pathway                                        |
|-------|----------------|----------|----------|--------------------------------------|--------------|------------------------------------------------|
| VEGFA | -2.28          | 1.07E-08 | 0.000105 | vascular endothelial growth factor A | hsa04066     | HIF-1 signaling pathway - Homo sapiens (human) |

Stromal cell type

| gene   | log2FoldChange | pvalue   | padj     | gene name                                             | KEGG pathway               | Pathway                                                                                                                                       |
|--------|----------------|----------|----------|-------------------------------------------------------|----------------------------|-----------------------------------------------------------------------------------------------------------------------------------------------|
| IRS2   | -1.52          | 1.94E-05 | 0.011439 | insulin receptor substrate 2                          | hsa04152                   | AMPK signaling pathway - Homo sapiens (human)                                                                                                 |
| LDHA   | -1.14          | 3.65E-05 | 0.018793 | lactate dehydrogenase A                               | hsa00010,hsa04066,hsa00620 | Glycolysis / Gluconeogenesis - Homo sapiens (human),HIF-1 signaling pathway - Homo sapiens (human),Pyruvate metabolism - Homo sapiens (human) |
| PFKFB3 | -1.49          | 8.2E-05  | 0.034727 | 6-phosphofructo-2-kinase/fructose-2,6-biphosphatase 3 | hsa04152,hsa04066          | AMPK signaling pathway - Homo sapiens (human),HIF-1 signaling pathway - Homo sapiens (human)                                                  |

Endothelial cell type

| gene     | log2FoldChange | pvalue   | padj     | gene name                    | KEGG pathway      | Pathway                                                                                      |
|----------|----------------|----------|----------|------------------------------|-------------------|----------------------------------------------------------------------------------------------|
| NOS3     | -1.28          | 1.21E-05 | 0.006569 | nitric oxide synthase 3      | hsa04066          | HIF-1 signaling pathway - Homo sapiens (human)                                               |
| SERPINE1 | 0.00           | 6.25E-05 | 0.024682 | serpin family E member 1     | hsa04066          | HIF-1 signaling pathway - Homo sapiens (human)                                               |
| IGF1     | 1.93           | 7.16E-05 | 0.027028 | insulin like growth factor 1 | hsa04152,hsa04066 | AMPK signaling pathway - Homo sapiens (human),HIF-1 signaling pathway - Homo sapiens (human) |

**Supplementary Table 5. Total cell counts and percentages for perivascular, stromal and endothelial clusters in ectopic endometrium (EcE) and eutopic endometrium (EuE) by cell cycle phases. Fisher's exact test was used to compare cell cluster proportions between EcE and EuE for each cell cycle phase.**

|                          |                     |                |                    |
|--------------------------|---------------------|----------------|--------------------|
| G1 phase                 | Perivascular, N (%) | Stromal, N (%) | Endothelial, N (%) |
| EcE                      | 981 (50%)           | 592 (47%)      | 593 (36%)          |
| EuE                      | 355 (67%)           | 3201 (75%)     | 204 (61%)          |
| Fisher's exact (P value) | 2.78E-134           | <4.58E-249     | 9.68E-88           |
| G2/M phase               | Perivascular, N (%) | Stromal, N (%) | Endothelial, N (%) |
| EcE                      | 490 (25%)           | 373 (30%)      | 341 (21%)          |
| EuE                      | 62 (12%)            | 370 (9%)       | 54 (16%)           |
| Fisher's exact (P value) | 3.18E-165           | 0.92           | 2.83E-102          |
| S phase                  | Perivascular, N (%) | Stromal, N (%) | Endothelial, N (%) |
| EcE                      | 488 (25%)           | 283 (23%)      | 696 (43%)          |
| EuE                      | 110 (21%)           | 713 (16%)      | 77 (23%)           |
| Fisher's exact (P value) | 1.28E-113           | 4.81E-85       | 4.58E-249          |



**Supplementary Table 6. Gene markers used for cell cluster annotation. The cluster names are**

|                 |               |                     |         |                       |
|-----------------|---------------|---------------------|---------|-----------------------|
| Cluster name    | Stromal cells | Stromal fibroblasts |         | Cycling stromal cells |
| Cluster ID      | 0, 2          | 5                   | 11      | 15                    |
| Gene markers    | IGF1          | IGF1                | IGF1    | IGF1                  |
|                 | ALDH1A2       | ALDH1A2             | ALDH1A2 | ALDH1A2               |
|                 | PAMR1         | PAMR1               | PAMR1   | PAMR1                 |
|                 | MMP11         | MMP11               | MMP11   | MMP11                 |
|                 | DPP6          | LUM                 | SFRP1   | SFRP4                 |
|                 | WT1           | OGN                 | ACTA2   | MKI67                 |
|                 |               | PDGFRA              | CNN1    | TOP2A                 |
|                 |               |                     | LONRF2  | TYMS                  |
| Merged clusters | Stromal       |                     |         | Cycling stromal       |

|                 |                        |                          |         |
|-----------------|------------------------|--------------------------|---------|
| Cluster name    | Endothelial vein cells | Endothelial artery cells | B cells |
| Cluster ID      | 1                      | 16                       | 12      |
| Gene markers    | EMCN                   | EMCN                     | BANK1   |
|                 | ADGRL4                 | ADGRL4                   | CD79A   |
|                 | VWF                    | VWF                      | CD37    |
|                 | PECAM1                 | PECAM1                   | MS4A1   |
|                 | CD34                   | CD34                     |         |
|                 | ACKR1                  | SEMA3G                   |         |
|                 | PLVAP                  | GJA5                     |         |
| Merged clusters | Endothelial            |                          | B cell  |

|                 |                      |         |                       |             |
|-----------------|----------------------|---------|-----------------------|-------------|
| Cluster name    | Natural killer cells | T cells | Innate lymphoid cells | Macrophages |
| Cluster ID      | 3                    | 4       | 17                    | 8           |
| Gene markers    | PTPRC                | PTPRC   | PTPRC                 | PLEK        |
|                 | STAT4                | STAT4   | STAT4                 | LYZ         |
|                 | CD69                 | CD69    | CD69                  | AIF1        |
|                 | CCL5                 | IL7R    | IL7R                  | IL1B        |
|                 | AOAH                 | CD8A    | KIT                   | MS4A6A      |
|                 | GZMA                 |         | CXCR4                 | CD68        |
|                 | NKG7                 |         |                       | CD14        |
| Merged clusters | Immune               |         |                       | Macrophage  |

|                 |                           |                             |                            |                              |
|-----------------|---------------------------|-----------------------------|----------------------------|------------------------------|
| Cluster name    | Perivascular cells (RGS5) | Perivascular cells (STEAP4) | Perivascular cells (MYH11) | Perivascular cells (GUCY1A2) |
| Cluster ID      | 6                         | 7                           | 9                          | 14                           |
| Gene markers    | RGS5                      | STEAP4                      | MYH11                      | GUCY1A2                      |
|                 | NOTCH3                    | NOTCH3                      | NOTCH3                     | NOTCH3                       |
|                 | PDE3A                     | PDE3A                       | PDE3A                      | PDE3A                        |
|                 | MYH11                     | MYH11                       | NTRK3                      | MYH11                        |
|                 | TBX2                      | ABCC9                       | NTRK2                      | OLFML2B                      |
|                 | CDH6                      | GGT5                        | FHL5                       | AFAP1L2                      |
|                 | NDUFA4L2                  |                             |                            |                              |
| Merged clusters | Perivascular              |                             |                            |                              |

|                 |                                                                                   |                                                   |
|-----------------|-----------------------------------------------------------------------------------|---------------------------------------------------|
| Cluster name    | Epithelial cells                                                                  | Unknown cells                                     |
| Cluster ID      | 13                                                                                | 10                                                |
| Gene markers    | RHEX<br>EYA2<br>EPCAM<br>PROM1<br>ENPP3<br>FGFR2<br>CDH1<br>SOX9<br>PIFO<br>WFDC2 | *No specific<br>marker gene set<br>was identified |
| Merged clusters | Epithelial                                                                        | Unknown                                           |

**Supplementary Table 7. A list of metabolic pathways obtained from KEGG pathway database, Homo sapiens (human).**

| Pathway name                                | Pathway identifier | No. of genes |
|---------------------------------------------|--------------------|--------------|
| Alanine, aspartate and glutamate metabolism | hsa00250           | 37           |
| AMPK signaling pathway                      | hsa04152           | 121          |
| Citrate cycle (TCA cycle)                   | hsa00020           | 30           |
| Fatty acid biosynthesis                     | hsa00061           | 18           |
| Fatty acid degradation                      | hsa00071           | 43           |
| Fatty acid elongation                       | hsa00062           | 27           |
| Glutathione metabolism                      | hsa00480           | 57           |
| Glycolysis / Gluconeogenesis                | hsa00010           | 67           |
| HIF-1 signaling pathway                     | hsa04066           | 109          |
| Oxidative phosphorylation                   | hsa00190           | 134          |
| Pentose phosphate pathway                   | hsa00030           | 30           |
| Pyruvate metabolism                         | hsa00620           | 47           |

**Supplementary Table 8. A list of genes from steroidogenesis pathway.**

| Gene          | Ensembl gene ID |
|---------------|-----------------|
| ESR1          | ENSG00000091831 |
| ESR2          | ENSG00000140009 |
| AR            | ENSG00000169083 |
| GR            | ENSG00000113580 |
| AKR1C1        | ENSG00000187134 |
| AKR1C2        | ENSG00000151632 |
| AKR1C4        | ENSG00000198610 |
| AKR1D1        | ENSG00000122787 |
| ARO           | ENSG00000137869 |
| CYP11A1       | ENSG00000140459 |
| CYP11B1       | ENSG00000160882 |
| CYP11B2       | ENSG00000179142 |
| CYP17A1       | ENSG00000148795 |
| CYP19A1       | ENSG00000137869 |
| CYP21A2       | ENSG00000231852 |
| DHRS11        | ENSG00000278535 |
| HSD11B1       | ENSG00000117594 |
| HSD11B2       | ENSG00000176387 |
| HSD17B1       | ENSG00000108786 |
| HSD17B10      | ENSG00000072506 |
| HSD17B11      | ENSG00000198189 |
| HSD17B13      | ENSG00000170509 |
| HSD17B14      | ENSG00000087076 |
| HSD17B2       | ENSG00000086696 |
| HSD17B3       | ENSG00000130948 |
| HSD17B4       | ENSG00000133835 |
| HSD17B5       | ENSG00000196139 |
| HSD17B6       | ENSG00000025423 |
| HSD17B7       | ENSG00000132196 |
| HSD17B8       | ENSG00000204228 |
| HSD17B9       | ENSG00000135437 |
| HSD3B1        | ENSG00000203857 |
| HSD3B2        | ENSG00000203859 |
| RDH11 (HAS15) | ENSG00000072042 |
| SRD5A1        | ENSG00000145545 |
| SRD5A2        | ENSG00000277893 |
| SRD5A3        | ENSG00000128039 |
| STAR          | ENSG00000147465 |
| STS           | ENSG00000101846 |
| SULT1A1       | ENSG00000196502 |
| SULT1A2       | ENSG00000197165 |
| SULT1A3       | ENSG00000261052 |
| SULT1B1       | ENSG00000173597 |
| SULT1E1       | ENSG00000109193 |
| SULT2A1       | ENSG00000105398 |
| SULT2B1       | ENSG00000088002 |
| PGR           | ENSG00000082175 |
